# 1 **Growth arrest in the active rare biosphere**

2 [Bela Hausmann](#) <sup>1,2</sup>, [Claus Pelikan](#) <sup>1</sup>, [Thomas Rattei](#) <sup>3</sup>, [Alexander Loy](#) <sup>1\*</sup>, and [Michael Pester](#) <sup>2,4\*</sup>

3 <sup>1</sup> University of Vienna, Research Network Chemistry meets Microbiology, Department of Microbiology  
4 and Ecosystem Science, Division of Microbial Ecology, Vienna, Austria

5 <sup>2</sup> University of Konstanz, Department of Biology, Konstanz, Germany

6 <sup>3</sup> University of Vienna, Research Network Chemistry meets Microbiology, Department of Microbiology  
7 and Ecosystem Science, Division of Computational Systems Biology, Vienna, Austria

8 <sup>4</sup> Leibniz Institute DSMZ, Braunschweig, Germany

9 \* Correspondence: Alexander Loy, University of Vienna, Research Network Chemistry meets  
10 Microbiology, Department of Microbiology and Ecosystem Science, Division of Microbial Ecology,  
11 Althanstraße 14, 1090 Vienna, Austria. Phone: +43 1 4277 76605. Fax: +43 1 4277 876605. E-mail:  
12 [loy@microbial-ecology.net](mailto:loy@microbial-ecology.net); and Michael Pester, Leibniz Institute DSMZ, Inhoffenstraße 7B, 38124  
13 Braunschweig, Germany. Phone: +49 531 2616 237. Fax: +49 531 2616 418. E-mail:  
14 [michael.pesther@dsmz.de](mailto:michael.pesther@dsmz.de).

## 15 **Significance**

16 The microbial rare biosphere represents the largest pool of biodiversity on Earth and constitutes, in  
17 sum of all its members, a considerable part of a habitat's biomass. Dormancy or starvation are  
18 typically used to explain a low-abundance state. We show that low-abundance microorganisms can  
19 be highly metabolically active while being growth-arrested over prolonged time periods. We show  
20 that this is true for microbial keystone species, such as a cosmopolitan but low-abundance sulfate  
21 reducer in wetlands that is involved in counterbalancing greenhouse gas emission. Our results  
22 challenge the central dogmas "metabolic activity translates directly into growth" as well as "low  
23 abundance equals little ecosystem impact" and provide an important step forward in understanding  
24 rare biosphere members relevant for ecosystem functions.

## 25 **Abstract**

26 Microbial diversity in the environment is mainly concealed within the rare biosphere, which is  
27 arbitrarily defined as all species with <0.1% relative abundance. While dormancy explains a low-  
28 abundance state very well, the cellular mechanisms leading to rare but active microorganisms are  
29 not clear. We used environmental systems biology to genomically and metabolically characterize a  
30 cosmopolitan sulfate reducer that is of low abundance but highly active in peat soil, where it  
31 contributes to counterbalance methane emissions. We obtained a 98%-complete genome of this low-  
32 abundance species, *Candidatus Desulfosporosinus infrequens*, by metagenomics. To test for  
33 environmentally relevant metabolic activity of *Ca. D. infrequens*, anoxic peat soil microcosms were  
34 incubated under diverse *in situ*-like conditions for 36 days and analyzed by metatranscriptomics.  
35 Compared to the no-substrate control, transcriptional activity of *Ca. D. infrequens* increased 56- to  
36 188-fold in incubations with sulfate and acetate, propionate, lactate, or butyrate, revealing a  
37 versatile substrate use. Cellular activation was due to a significant overexpression of genes encoding  
38 ribosomal proteins, dissimilatory sulfate reduction, and carbon-degradation pathways, but not of  
39 genes encoding DNA or cell replication. We show for the first time that a rare biosphere member  
40 transcribes metabolic pathways relevant for carbon and sulfur cycling over prolonged time periods  
41 while being growth-arrested in its lag phase.

## 42 **Keywords**

43 rare biosphere | growth arrest | keystone species | lag phase | sulfur cycle | systems biology

## 44 **Author contributions**

45 B.H., A.L., and M.P. designed research; B.H. performed research; T.R. contributed computational  
46 resources; B.H., C.P., A.L., and M.P. analyzed data; B.H., A.L., and M.P. wrote the paper.

## 47 **Introduction**

48 The vast majority of microbial diversity worldwide is represented by the rare biosphere (Sogin *et al.*,  
49 2006; Pedrós-Alió, 2012; Lynch and Neufeld, 2015; Jousset *et al.*, 2017). This entity of  
50 microorganisms consists of all microbial species that have an arbitrarily defined relative population  
51 size of <0.1% in a given habitat at a given time (Sogin *et al.*, 2006; Pedrós-Alió, 2012; Lynch and  
52 Neufeld, 2015; Jousset *et al.*, 2017). The rare biosphere is opposed by a much smaller number of  
53 moderately abundant or very abundant microbial species ( $\geq 0.1\%$  and  $\geq 1.0\%$  relative abundance,  
54 respectively, Hausmann *et al.*, 2016), which are thought to be responsible for the major carbon and  
55 energy flow through a habitat as based on their cumulative biomass. However, there is accumulating  
56 experimental evidence that the rare biosphere is not just a so-called “seed bank” of microorganisms  
57 that are waiting to become active and numerically dominant upon environmental change (Müller *et*  
58 *al.*, 2014; Lynch and Neufeld, 2015), but also harbors metabolically active microorganisms with  
59 important ecosystem functions (Jousset *et al.*, 2017).

60 First hints for metabolically active rare biosphere members were evident from seasonal patterns of  
61 marine bacterioplankton species. Here, many taxa that displayed recurring annual abundance  
62 changes were of low abundance and even during their bloom periods never reached numerically  
63 abundant population sizes (Campbell *et al.*, 2011; Hugoni *et al.*, 2013; Alonso-Sáez *et al.*, 2015). In  
64 soil environments, removal of low-abundance species by dilution-to-extinction had a positive effect  
65 on intruding species, suggesting that active low-abundance species pre-occupy ecological niches and  
66 thus slow down invasion (van Elsas *et al.*, 2012; Vivant *et al.*, 2013; Mallon *et al.*, 2015). Soil  
67 microorganisms of low relative abundance were also shown to play a role in community-wide species  
68 interactions, e.g, by being involved in the production of antifungal compounds that protect plants  
69 from pathogens (Hol *et al.*, 2015) or by constituting the core of microorganisms that respond to the  
70 presence of a particular plant species (Dawson *et al.*, 2017). Other examples include microorganisms  
71 with a specialized metabolism that sustain stable low-abundance populations in an ecosystem  
72 (Lynch and Neufeld, 2015). For example, N<sub>2</sub>-fixing microorganisms in the ocean (Großkopf *et al.*,  
73 2012) or sulfate-reducing microorganisms (SRM) in peatlands (Pester *et al.*, 2010, 2012b; Hausmann  
74 *et al.*, 2016) were shown to fulfill such gatekeeper functions.

75 A peatland *Desulfosporosinus* species was one of the first examples identified as an active rare  
76 biosphere member contributing to an important ecosystem function (Pester *et al.*, 2010). This SRM is  
77 involved in the cryptic sulfur cycle of peatlands (Pester *et al.*, 2010; Hausmann *et al.*, 2016), which in  
78 turn controls the emission of the greenhouse gas CH<sub>4</sub> from these globally relevant environments  
79 (Pester *et al.*, 2012b). Although porewater sulfate concentrations are typically quite low in peatlands  
80 (<300  $\mu\text{M}$ , Pester *et al.*, 2012b), these environments are characterized by temporally fluctuating high  
81 sulfate reduction rates (up to 1800  $\text{nmol cm}^{-3} \text{ day}^{-1}$ , Pester *et al.*, 2012b). These rates can be in the  
82 same range as in sulfate-rich marine surface sediments, where sulfate reduction is one of the major  
83 anaerobic carbon degradation pathways (e.g., Jørgensen, 1982; Leloup *et al.*, 2009; Holmkvist *et al.*,  
84 2011a, 2011b). In low-sulfate peatlands, such high sulfate reduction rates can only be maintained by

85 rapid aerobic or anaerobic re-oxidation of reduced sulfur species back to sulfate (Pester *et al.*,  
86 2012b). Since SRM generally outcompete methanogens and syntrophically associated fermenters  
87 (Muyzer and Stams, 2008), they exert an important intrinsic control function on peatland CH<sub>4</sub>  
88 production (Gauci *et al.*, 2004, 2005; Gauci and Chapman, 2006). This is important, since natural  
89 wetlands, such as peatlands, are estimated to be responsible for 30% of the annual emission of this  
90 potent greenhouse gas (Ciais *et al.*, 2013; Kirschke *et al.*, 2013; Saunio *et al.*, 2016).

91 Little is known about the ecophysiology of metabolically active but low-abundance microorganisms.  
92 This lack of knowledge is clearly founded in their low numerical abundance making it inherently  
93 difficult to study their metabolic responses or even to retrieve their genomes directly from the  
94 environment. In a preceding study, we could show that the low-abundance peatland  
95 *Desulfosporosinus* species mentioned above follows an ecological strategy to increase its cellular  
96 ribosome content while maintaining a stable population size when exposed to favorable, sulfate-  
97 reducing conditions (Hausmann *et al.*, 2016). This was unexpected since metabolic activity in  
98 bacteria and archaea is typically immediately followed by growth. Furthermore, this  
99 *Desulfosporosinus* species can be found worldwide in a wide range of low-sulfate wetlands including  
100 not only peatlands but also permafrost soils and rice paddy fields (Hausmann *et al.*, 2016), which  
101 emphasizes its importance as a model organism for active rare biosphere members. In this study, we  
102 used an environmental systems biology approach to deepen our understanding of the ecophysiology  
103 of this rare biosphere member. In particular, we retrieved its genome directly from a combination of  
104 native and incubated peat soil and followed its transcriptional responses in peat soil microcosms,  
105 which were exposed to different environmental triggers that mimicked diverse *in situ* conditions.

## 106 **Results**

### 107 **Recovery of a near complete genome of a rare biosphere member: *Desulfosporosinus*** 108 **MAG SbF1 represents a novel species**

109 We obtained the population genome of the low-abundance *Desulfosporosinus* species by co-  
110 assembly and differential coverage binning of metagenomes obtained from native peat soil and <sup>13</sup>C-  
111 fractions of a DNA-stable isotope probing experiment (Fig. S1) (Hausmann *et al.*, 2018). The high  
112 quality metagenome-assembled genome (MAG) SbF1 had a size of 5.3 Mbp (on 971 scaffolds), a G+C  
113 content of 42.6%, a checkM-estimated completeness of 98.0%, a potential residual contamination of  
114 3.9%, and 10% strain heterogeneity. Besides 16S and 23S rRNA genes, SbF1 carried 6440 protein-  
115 coding genes (CDS), five 5S rRNA gene copies, 59 tRNAs, and 37 other ncRNAs, making a total of  
116 6543 predicted genomic features. Scaffolds encoding rRNA genes had a higher coverage compared  
117 to the average coverage of all scaffolds (Fig. S1), indicating multiple *rrn* operon copies, as is known  
118 from other *Desulfosporosinus* genomes. The 16S rRNA gene was 100% identical to  
119 *Desulfosporosinus* OTU0051, which was previously shown to correlate strongest among all  
120 recognized SRM to sulfate turnover in microcosms of the analyzed peat soil (Hausmann *et al.*, 2016).  
121 The genome size and G+C content was in the same range as observed for genomes of cultured  
122 *Desulfosporosinus* species (3.0–5.9 Mbp and 42–44%, respectively; Abicht *et al.*, 2011; Pester *et al.*,

123 2012a; Abu Laban *et al.*, 2015; Petzsch *et al.*, 2015; Mardanov *et al.*, 2016).

124 In the 16S rRNA tree, SbF1 formed a well supported clade with *Desulfosporosinus* sp. 44a-T3a (98.3%  
125 sequence identity), *Desulfosporosinus* sp. OT (98.8%), and *Desulfosporosinus* sp. 5apy (98.1%). The  
126 most similar validly described species was *D. lacus* with a sequence identity of 97.5% (Fig. S2a).  
127 Phylogenomics confirmed *Desulfosporosinus* sp. OT as the closest relative (Fig. S2b) with average  
128 amino and nucleic acid identities (AAI and ANI) of 77% and 79%, respectively (Fig. S3). The intra-  
129 genus AAI variability of *Desulfosporosinus* species was 69–93% (Fig. S3). MAG SbF1 represents a  
130 novel species in this genus based on species-level thresholds of 99% for the 16S rRNA gene  
131 (Stackebrandt and Ebers, 2006) and 96.5% for ANI (Varghese *et al.*, 2015).

## 132 **The versatile energy metabolism of the low-abundance *Desulfosporosinus***

133 *Desulfosporosinus* MAG SbF1 encoded the complete canonical pathway for dissimilatory sulfate  
134 reduction (Fig. 1, Table S1). This encompassed the sulfate adenylyltransferase (Sat), adenylyl-sulfate  
135 reductase (AprBA), dissimilatory sulfite reductase (DsrAB), and the sulfide-releasing DsrC, which are  
136 sequentially involved in the reduction of sulfate to sulfide. In addition, genes encoding the electron-  
137 transferring QmoAB and DsrMKJOP complexes were detected, with their subunit composition being  
138 typical for *Desulfosporosinus* species (Abicht *et al.*, 2011; Pester *et al.*, 2012a; Petzsch *et al.*, 2015;  
139 Mardanov *et al.*, 2016). Other *dsr* genes included *dsrD*, *dsrN*, and *dsrT* (Rabus *et al.*, 2015), with  
140 hitherto unvalidated function, as well as *fdxD*, which encodes a [4Fe4S]-ferredoxin, and a second set  
141 of DsrMK-family encoding genes (*dsrM2* and *dsrK2*). SbF1 also encoded the trimeric dissimilatory  
142 sulfite reductase AsrABC (anaerobic sulfite reductase) (Huang and Barrett, 1991).

143 SbF1 carries genes for both complete and incomplete oxidation of propionate and lactate. In  
144 addition, the ability to utilize acetate, formate, or H<sub>2</sub> as electron donors was encoded (Fig. 1). All  
145 enzymes necessary for propionate oxidation to the central metabolite pyruvate (including those  
146 belonging to a partial citric acid cycle) were encoded on two scaffolds (Table S1). For lactate  
147 utilization, SbF1 carried three paralogs of glycolate/D-lactate/L-lactate dehydrogenase family genes.  
148 However, the substrate specificity of the encoded enzymes could not be inferred from sequence  
149 information alone. The transcription of *lutDF* and *lutD\_2* was stimulated by the addition of L-lactate  
150 (Fig. 1), which indicates that these genes encode functional lactate dehydrogenases (LDH). The third  
151 paralog (*glcDF*, Table S1) was not stimulated by lactate. LutDF was organized in an operon with a  
152 lactate permease (LutP) and a lactate regulatory gene (*lutR*). LutD\_2 was organized in an operon with  
153 an electron-transferring flavoprotein (EtfBA\_2), which resembled the electron-confurcating LDH/Etf  
154 complex in *Acetobacterium woodii* (Weghoff *et al.*, 2015). LDHs have been shown to utilize both L-  
155 and D-lactate (e.g., Weghoff *et al.*, 2015; Zhang *et al.*, 2016). However, SbF1 also encoded a lactate  
156 racemase (LarA) and a lactate racemase-activating system (LarEBC) for interconversion of both  
157 stereoisomers (Desguin *et al.*, 2014).

158 Pyruvate, the intermediate product in propionate and lactate degradation, can be further oxidized to  
159 acetyl-CoA with either one of several pyruvate-ferredoxin oxidoreductases (PfoA) or formate C-

160 acetyltransferase (PflD). Acetyl-CoA can then be completely oxidized to CO<sub>2</sub> via the Wood-Ljungdahl  
161 pathway (Pierce *et al.*, 2008), which is complete in SbF1 (Fig. 1, Table S1) and present in the  
162 genomes of all other sequenced *Desulfosporosinus* species (Abicht *et al.*, 2011; Pester *et al.*, 2012a;  
163 Petzsch *et al.*, 2015; Mardanov *et al.*, 2016). Alternatively, acetyl-CoA may be incompletely oxidized  
164 to acetate via acetyl-phosphate by phosphate acetyltransferase (Pta) and acetate kinase (AckA). Pta  
165 and AckA are bidirectional enzymes, opening the possibility that acetate could be degraded via these  
166 two enzymes and the downstream Wood-Ljungdahl pathway to CO<sub>2</sub>.

167 Formate and H<sub>2</sub> represented additional potential electron donors for SbF1. Its genome encoded three  
168 formate dehydrogenases (FDH). FDH-1 consists of three subunits (*fdhCBA*) while FDH-2 (*FdhA\_2*) and  
169 FDH-3 (*FdhA-3*) are monomeric enzymes. In addition, [NiFe] hydrogenases of group 1 and 4f, as well  
170 as [FeFe] hydrogenases of group A (Greening *et al.*, 2016) were encoded. Homologs of genes for  
171 butyrate oxidation were missing in SbF1 (Schmidt *et al.*, 2013), which is in contrast to other  
172 *Desulfosporosinus* species (e.g., *D. orientis*). Both glycolysis and gluconeogenesis were complete.  
173 However, neither a glucokinase or a phosphotransferase system was found (PTS). Coupling of  
174 electron transfer to energy conservation could be mediated in SbF1 by a H<sup>+</sup>/Na<sup>+</sup>-pumping Rnf  
175 complex (RnfCDGEAB) (Buckel and Thauer, 2013) and a NADH dehydrogenase (respiratory complex  
176 I, NuoABCDEFGHIJKLMN). In addition, the complete gene set for ATP synthase (AtpABCDEFGH) was  
177 identified (Fig. 1, Table S1).

## 178 **Activation of energy metabolism is uncoupled from cell division initiation**

179 We used metatranscriptomics to analyse gene expression changes of *Desulfosporosinus* MAG SbF1 in  
180 anoxic peat microcosms, which mimicked diverse *in situ*-like conditions. Total transcriptional activity  
181 of *Desulfosporosinus* MAG SbF1 was clearly stimulated by individual additions of acetate, propionate,  
182 lactate, and butyrate in combination with sulfate. In these incubations, total mRNA counts of SbF1  
183 increased by 56-, 80-, 62-, and 188-fold as compared to the no-substrate-control, respectively, and  
184 constituted between 0.11 ± 0.13% (acetate) and 0.36 ± 0.02% (butyrate) of all transcripts in the  
185 respective metatranscriptomes after 36 days (Fig. 2a). This substrate-specific activity was mirrored  
186 in the increased transcription of genes encoding ribosomal proteins as general activity markers (Fig.  
187 2b) and of all dissimilatory sulfate reduction genes, except the alternative pathway via *asrABC* (Fig.  
188 3). For example, Spearman's rank correlation coefficients of *dsrA* and *dsrB* transcripts as compared  
189 to total mRNA counts were 0.91 and 0.90, respectively (FDR-adjusted *p*-value < 0.001). Other  
190 enzyme complexes involved in the central metabolism of SbF1 such as the ATP synthase, the NADH  
191 dehydrogenase (complex I), and ribosomal proteins followed the same transcriptional pattern (Fig. 3)  
192 with an average Spearman's rank correlation coefficients of 0.79 ± 0.07 (n = 72, FDR-adjusted *p*-  
193 value < 0.05) to total mRNA counts. Interestingly, transcription of genes encoding proteins involved  
194 in general stress response were stimulated as well. In particular, genes encoding the universal stress  
195 promoter UspA and the GroSL chaperonin showed an increased transcription (Fig. 3) with an average  
196 Spearman's rank correlation coefficients of 0.76 ± 0.06 (n = 3, FDR-adjusted *p*-value < 0.05) to total  
197 mRNA counts.



198 In addition, we screened the COG categories D, L, and M for indicator genes that encode functions in  
199 cell division (e.g., *ftsZ* or *minE*), DNA replication (e.g., *gyrBA*, *dnaC*, and *dnaG*) and cell envelope  
200 biogenesis (e.g., *murABCDEFGI*), respectively, and followed their expression patterns. Genes that  
201 unambiguously encoded such functions (Table S1) showed either no or only barely detectable but  
202 insignificant (FDR-adjusted  $p$ -value  $> 0.05$ ) increases in transcripts under these conditions (Fig. 2b,  
203 detailed in Fig. S4). Extension of this analysis to all genes belonging to COG D ( $n = 73$ ), L ( $n = 280$ ),  
204 and M ( $n = 215$ ), which included also genes with ambiguous classification or unknown function,  
205 revealed that also here 96%, 99%, and 99%, respectively, were not significantly overexpressed  
206 under acetate, propionate, lactate, and butyrate in combination with sulfate (Table S1, Table S3).  
207 Here, the average Spearman's rank correlation coefficients to total mRNA counts was only  $0.45 \pm$   
208  $0.13$  (FDR-adjusted  $p$ -value  $< 0.05$ , Table S1).

209 We also analysed genes reported to be upregulated immediately after phage infection, as a potential  
210 ecological driver that controls bacterial population size. Respective genes in *Bacillus subtilis* encode,  
211 e.g., functions in DNA and protein metabolism and include the ribonucleoside-diphosphate reductase  
212 (*nrdEF*), aspartyl/glutamyl-tRNA amidotransferase (*gatCAB*), and the proteolytic subunit of ATP-  
213 dependent Clp protease (*clpP*) (Mojardín and Salas, 2016). However, homologs in SbF1 were not  
214 significantly overexpressed (FDR-adjusted  $p$ -value  $> 0.05$ ), which was reflected in an average  
215 Spearman's rank correlation coefficient of  $0.63 \pm 0.08$  ( $n = 5$ , FDR-adjusted  $p$ -value  $< 0.05$ ) to total  
216 mRNA counts. The same was true when screening for active sporulation of a *Desulfosporosinus*  
217 subpopulation as an alternative explanation for a low population size. The identified sporulation  
218 genes (*spo0A-spoVT*) did not show any significant increase in transcript numbers as well, with the  
219 only exception of *spolIAD*. This stage III sporulation gene was significantly more abundant when  
220 stimulated with propionate and sulfate, however did not correlate to total mRNA levels (Table S1).  
221 Again, genes involved in sporulation had a low average Spearman's rank correlation coefficient of  
222  $0.44 \pm 0.13$  ( $n = 22$ , FDR-adjusted  $p$ -value  $< 0.05$ ) to total mRNA counts.

223 The individual incubation regimes additionally triggered transcriptional activation of the respective  
224 substrate degradation pathways of *Desulfosporosinus* MAG SbF1. For example, all genes necessary  
225 for the conversion of propionate to pyruvate were overexpressed only upon addition of propionate  
226 and sulfate but not in any other incubation type. The same was true for lactate degradation, where  
227 genes encoding the lactate permease, lactate racemase and two of the detected lactate  
228 dehydrogenases were overexpressed upon addition of both lactate and sulfate, but not in  
229 incubations with lactate only (Fig. 3). Although genes encoding phosphotransacetylase and acetate  
230 kinase were overexpressed under lactate and propionate, the complete Wood-Ljungdahl pathway  
231 was overexpressed as well, which indicates that at least part of these substrates were completely  
232 degraded to  $\text{CO}_2$  rather than to acetate and  $\text{CO}_2$ . This conclusion was supported by the  
233 overexpression of the Wood-Ljungdahl pathway in incubations amended with acetate and sulfate.  
234 Interestingly, the Wood-Ljungdahl pathway was also overexpressed upon addition of butyrate and  
235 sulfate. Under such conditions, *Desulfosporosinus* MAG SbF1 apparently relies on a syntrophic  
236 lifestyle based on acetate uptake as it lacked the capability for butyrate oxidation; albeit failed

237 recovery of the butyrate degradation pathway during binning cannot be excluded.

## 238 Discussion

239 Current knowledge on the mechanisms that interconnect energy metabolism, gene expression, cell  
240 division, and population growth of microorganisms are mainly based on pure cultures that can be  
241 easily maintained in the laboratory. Here, the typical lifecycle of a metabolically active  
242 microorganisms would go through an activating lag phase, an exponential growth phase, and a  
243 stationary phase upon limitation of substrate, nutrient, or space. Under ideal conditions, a single  
244 *Escherichia coli* cell would grow to a population with the mass of the Earth within 2 days. Clearly, this  
245 does not occur, but the discrepancy between potential and actual growth underscores that  
246 microorganisms spend the vast majority of their time not dividing (Bergkessel *et al.*, 2016). A large  
247 fraction of these microorganisms is part of the rare biosphere. For example, in the studied peatland,  
248 the sum of all low-abundance species made up approximately 12% of the total bacterial and  
249 archaeal 16S rRNA genes (Hausmann *et al.*, 2016). In other soils, low-abundance  
250 *Alphaproteobacteria* and *Bacteroidetes* alone constituted in sum 10% and 9% of the total bacterial  
251 population, respectively, while all low-abundance populations summed up to 37% of all bacteria  
252 (Dawson *et al.*, 2017). Upon strong environmental change, low-abundance microorganisms often  
253 grow to numerically abundant populations and replace dominant species as observed for microbial  
254 community changes after an oil spill (Teira *et al.*, 2007; Newton *et al.*, 2013) or in the response of  
255 soil microorganisms towards the presence of plants (Dawson *et al.*, 2017). However, subtle  
256 environmental changes (Hausmann *et al.*, 2016) or recurring seasonal shifts (Campbell *et al.*, 2011;  
257 Vergin *et al.*, 2013; Alonso-Sáez *et al.*, 2015) often lead to rather small shifts in low-abundance  
258 populations without rare biosphere members becoming numerically dominant.

259 The low-abundance *Desulfosporosinus* MAG SbF1 represents an interesting case of the latter  
260 response type. When exposed to favorable, sulfate-reducing conditions in peat soil microcosms, it  
261 did not increase its population size but drastically increased its cellular ribosome content by one  
262 order of magnitude to 57,000–84,000 16S rRNA molecules per cell (Hausmann *et al.*, 2016).  
263 Throughout the incubation period of 50 days, it correlated best in its 16S rRNA response to sulfate  
264 turnover among all identified SRM (Hausmann *et al.*, 2016). In this study, we expanded upon this  
265 observation by genome-centric metatranscriptomics to test whether the increase in cellular ribosome  
266 content is indeed translated into increased transcriptional and, as a consequence, metabolic activity  
267 of *Desulfosporosinus* MAG SbF1. As expected, increases in cellular 16S rRNA content clearly  
268 corresponded to increased transcription of genes coding for ribosomal proteins (Fig. 2b; Hausmann  
269 *et al.*, 2016). This cellular ribosome increase under sulfate-reducing conditions was correlated to an  
270 increase in total mRNA counts (Fig. 2). This is the first time that changes in population-wide 16S  
271 rRNA levels are proven to be directly linked to transcriptional activity for a rare biosphere member.

272 Analyzing the transcriptional response of a rare biosphere member under *in situ*-like conditions  
273 opens the unique opportunity to gain insights into its ecophysiology. *Desulfosporosinus* MAG SbF1



274 clearly overexpressed its sulfate reduction pathway under sulfate amendment when supplied with  
275 either acetate, lactate, propionate, or butyrate as compared to the no-substrate and the  
276 methanogenic controls (Fig. 3). Detailed analysis of the transcribed carbon degradation pathways  
277 showed that *Desulfosporosinus* MAG SbF1 is able to oxidize propionate, lactate, and acetate  
278 completely to CO<sub>2</sub>. Under butyrate-amended conditions it presumably relied on syntrophic oxidation  
279 of acetate supplied by a primary butyrate oxidizer. This shows that *Desulfosporosinus* MAG SbF1 is  
280 capable of utilizing diverse substrates that represent the most important carbon degradation  
281 intermediates measured in peatlands (Schmalenberger *et al.*, 2007; Küsel *et al.*, 2008). Such a  
282 generalist lifestyle is of clear advantage in peat soil given the highly variable nutrient and redox  
283 conditions (Schmalenberger *et al.*, 2007; Küsel *et al.*, 2008). These fluctuations are caused by the  
284 periodically changing water table that steadily shifts the oxic-anoxic interface (Knorr *et al.*, 2009;  
285 Reiche *et al.*, 2009). In addition, the complex flow paths of water create distinct spatial and temporal  
286 patterns (hot spots and hot moments) of various biogeochemical parameters, to which peat  
287 microorganisms have to adapt (Jacks and Norrström, 2004; Knorr *et al.*, 2009; Knorr and Blodau,  
288 2009; Frei *et al.*, 2012).

289 The question remains, which mechanisms are at work that keep the *Desulfosporosinus* MAG SbF1  
290 population in a stable low-abundance state? Population sizes can be kept low by actively restricting  
291 growth. Alternatively, ongoing growth could be hidden by continuous predation, viral lysis, or active  
292 sporulation of a major subpopulation. To answer this question, we analysed expression patterns of  
293 growth-specific genes. Compared to the strong overexpression of metabolic or ribosomal protein  
294 genes, transcription of genes essential for DNA replication, cell division, and cell envelope biogenesis  
295 did not increase or only marginally (Fig. 2b, Fig. S4). Genes encoding DNA replication or cell division  
296 typically show a largely invariable transcription in the exponential and stationary phase (e.g., Sumbly  
297 *et al.*, 2012; Brudal *et al.*, 2013; Sihto *et al.*, 2014). However, there is experimental evidence that in  
298 the lag phase transcription of growth-specific genes is not stable but increases due to the overall  
299 activation of cellular processes (Rolfe *et al.*, 2012). In this context, the lack of an increasing  
300 transcription of growth-specific genes would clearly indicate a state of no growth rather than an  
301 actively dividing population that is kept stable by an equally high growth and mortality or sporulation  
302 rate. This conclusion is further corroborated by the lack of overexpressed sporulation genes or genes  
303 upregulated directly after phage attack. Nevertheless, the ATP generated by the induced energy  
304 metabolism has to be utilized somehow. This could be mediated by the production of storage  
305 compounds or by counterbalancing environmental stress. We found no indication for the former  
306 scenario but observed overexpression of the universal stress promotor *UspA*, which is one of the  
307 most abundant proteins in growth-arrested cells (Kvint *et al.*, 2003), and the chaperonin *GroSL*,  
308 which was linked previously to stress response such as low pH (Silva *et al.*, 2005). Since the pH in  
309 the analyzed peat soil incubations varied between 4.1–5.0 (Hausmann *et al.*, 2016), coping with a  
310 low pH would be the most likely reason that deviates ATP away from growth towards stress  
311 response. Based on the integrated findings of our previous study (stable population over 50 days as  
312 based on 16S rRNA gene counts; Hausmann *et al.*, 2016), and this study (no activation of the DNA  
313 replication and cell division machinery within 36 days), we propose that *Desulfosporosinus* MAG SbF1

314 was growth-arrested in the lag phase over a period of at least 50 days while being a metabolically  
315 active rare biosphere member. This finding shows that growth arrest is not restricted to starving or  
316 otherwise limited microorganisms that persist in the environment (Bergkessel *et al.*, 2016) but can  
317 also occur in metabolically highly active microorganisms.

318 Our results are important in the context of the increasing awareness that the microbial rare  
319 biosphere is not only the largest pool of biodiversity on Earth (Sogin *et al.*, 2006; Pedrós-Alió, 2012;  
320 Lynch and Neufeld, 2015; Jousset *et al.*, 2017) but in sum of all its low-abundance members  
321 constitutes also a large part of the biomass in a given habitat (e.g., Hausmann *et al.*, 2016; Dawson  
322 *et al.*, 2017). Understanding the mechanisms governing this low-abundance prevalence and its direct  
323 impact on ecosystem functions and biogeochemical cycling is thus of utmost importance.  
324 *Desulfosporosinus* MAG SbF1 has been repeatedly shown to be involved in cryptic sulfur cycling in  
325 peatlands (Pester *et al.*, 2010; Hausmann *et al.*, 2016) — a process that counterbalances the  
326 emission of the greenhouse gas methane due to the competitive advantage of SRM as compared to  
327 microorganisms involved in the methanogenic degradation pathways (Muyzer and Stams, 2008).  
328 This species can be found worldwide in low-sulfate environments impacted by cryptic sulfur cycling  
329 including not only peatlands but also permafrost soils, rice paddies, and other wetland types  
330 (Hausmann *et al.*, 2016). Here, we provided proof that *Desulfosporosinus* MAG SbF1 is indeed  
331 involved in the degradation of important anaerobic carbon degradation intermediates in peatlands  
332 while sustaining a low-abundance population. It has a generalist lifestyle in respect to the usable  
333 carbon sources, re-emphasizing its importance in the carbon and sulfur cycle of peatlands. Our  
334 results provide an important step forward in understanding the microbial ecology of  
335 biogeochemically relevant microorganisms and show that low-abundance keystone species can be  
336 studied “in the wild” using modern environmental systems biology approaches.

## 337 **Proposal of *Candidatus Desulfosporosinus infrequens***

338 Based on its phylogenetic placement and novel ecophysiological behaviour, we propose that  
339 *Desulfosporosinus* MAG SbF1 represents a novel species with the provisional name *Candidatus*  
340 *Desulfosporosinus infrequens* sp. nov. (in.fre'quens. L. adj. *infrequens*, rare, referring to its low  
341 relative abundance). Based on its genome-derived metabolic potential and support from  
342 metatranscriptomics, *Ca. D. infrequens* is capable of complete oxidation of acetate, propionate and  
343 lactate with sulfate as the electron acceptor, with further potential for oxidation of molecular  
344 hydrogen (Fig. 1).

## 345 **Materials and Methods**

### 346 **Genome assembly, binning, and phylogenetic inference**

347 Sampling of peat soil from the acidic peatland Schlöppnerbrunnen II (Germany), DNA-stable isotope  
348 probing (DNA-SIP), total nucleic acids extraction, metagenome sequencing and assembly, and  
349 coverage-based binning was described previously (Pester *et al.*, 2010, Hausmann *et al.* (2016);

350 Hausmann *et al.*, 2018). In brief, DNA from native peat soil (10–20 cm depth) and DNA pooled from  
351 16 <sup>13</sup>C-enriched fractions (density 1.715–1.726 g mL<sup>-1</sup>) of a previous DNA-SIP experiment with soil  
352 from the same site (Pester *et al.*, 2010) was sequenced using the Illumina HiSeq 2000 system. DNA-  
353 SIP was performed after a 73-day incubation (again 10–20 cm depth) that was periodically amended  
354 with small dosages of sulfate and first a mixture of unlabeled formate, acetate, propionate, and  
355 lactate for two weeks and thereafter a mixture of <sup>13</sup>C-labeled formate, acetate, propionate, and  
356 lactate (all in the lower μM-range) (Pester *et al.*, 2010). Raw reads were quality filtered, trimmed,  
357 and co-assembled into one metagenomic assembly using the CLC Genomics Workbench 5.5.1 (CLC  
358 Bio). Differential coverage binning was applied to extract the *Desulfosporosinus* metagenome-  
359 assembled genome (MAG) (Albertsen *et al.*, 2013). A side effect of sequencing a DNA-SIP sample is  
360 an apparent G+C content skew, which was normalized arbitrarily to improve binning using the  
361 following formula (Herbold *et al.*, 2017; Hausmann *et al.*, 2018):

$$\frac{\text{Coverage}}{\text{G+C content}^9} \times 10^{15}$$

364 Scaffolds encoding the 16S and 23S rRNA genes were successfully identified using paired-end  
365 linkage data (Albertsen *et al.*, 2013). Completeness, contamination, and strain heterogeneity was  
366 estimated using CheckM 1.0.6 (Parks *et al.*, 2015).

367 Phylogenomic analysis of the *Desulfosporosinus* MAG was based on a concatenated set of 34  
368 phylogenetically informative marker genes as defined by Parks *et al.* (2015) and the Bayesian  
369 phylogeny inference method PhyloBayes using the CAT-GTR model (Lartillot *et al.*, 2009). 16S rRNA  
370 gene-based phylogeny was inferred using the ARB SILVA database r126 as a reference (Quast *et al.*,  
371 2013), the SINA aligner (Pruesse *et al.*, 2012), and the substitution model testing and maximum  
372 likelihood treeing method IQ-TREE (Trifinopoulos *et al.*, 2016). Pairwise 16S rRNA gene sequence  
373 identities were calculated with T-Coffee 11 (Notredame *et al.*, 2000). Pairwise average nucleic and  
374 amino acid identities (ANI, AAI, Varghese *et al.*, 2015) between protein-coding genes of the  
375 *Desulfosporosinus* MAG and reference genomes were calculated as described previously (Hausmann  
376 *et al.*, 2018)

## 377 **Genome annotation**

378 The genome was annotated using the MicroScope annotation platform (Vallenet *et al.*, 2017).  
379 Annotation refinement for selected genes was done as follows: proteins with an amino acid identity  
380 ≥40% (over ≥80% of the sequence) to a Swiss-Prot entry (The UniProt Consortium, 2017), curated  
381 MaGe annotation (Vallenet *et al.*, 2017), or protein described in the literature were annotated as true  
382 homologs of known proteins. The same was true, if classification according to InterPro families  
383 (Mitchell *et al.*, 2015; Jones *et al.*, 2014), TIGRFAMs (Haft *et al.*, 2003), and/or FIGfams (Overbeek *et al.*,  
384 2014) led to an unambiguous annotation. Proteins with an amino acid identity ≥25% (over ≥80%  
385 of the sequence) to a Swiss-Prot or TrEMBL (The UniProt Consortium, 2017) entry were annotated as

386 putative homologs of the respective database entries. In addition, classification according to COG  
387 (Galperin *et al.*, 2015) or InterPro superfamilies, domains, or binding sites were used to call putative  
388 homologs in cases of an unambiguous annotation. Membership to syntenic regions (operons) was  
389 considered as additional support to call true or putative homologs.

## 390 **Metatranscriptomics from single-substrate incubations**

391 We analysed total RNA from anoxic peat soil slurry microcosms that were described previously  
392 (Hausmann *et al.*, 2016, 2018). In brief, anoxic microcosms were incubated at 14 °C in the dark for  
393 50 days and regularly amended with either low amounts of sulfate (76–387 µM final concentrations)  
394 or incubated without an external electron acceptor. Formate, acetate, propionate, lactate, butyrate  
395 (<200 µM), or no external electron donor was added to biological triplicates each. RNA was extracted  
396 from the native soil, and after 8 and 36 days of incubations, followed by sequencing with the Illumina  
397 HiSeq 2000/2500 system. Raw reads were quality-filtered as described previously (Hausmann *et al.*,  
398 2018) and mapped to the combined metagenomic assembly using Bowtie 2 (Langmead and  
399 Salzberg, 2012). Counting of mapped reads to protein-coding genes (CDS) was performed with  
400 featureCounts 1.5.0 (Liao *et al.*, 2014). We used an unsupervised approach to identify CDS  
401 stimulated by sulfate and the different substrates regimes. First, we applied the DESeq2 R package  
402 (Love *et al.*, 2014; R Core Team, 2017) to identify differentially expressed CDS. Treatments without  
403 external sulfate added and samples after 8 days of incubations had too little transcript counts to be  
404 used for a statistical approach. Therefore, we limited our analysis to pairwise comparison of sulfate-  
405 stimulated microcosms after 36 days of incubations. We compared each substrate regime to the no-  
406 substrate controls and each other. The set of all significantly differentially expressed CDS (FDR-  
407 adjusted  $p$ -value < 0.05) were further clustered into response groups. For clustering, we calculated  
408 pairwise Pearson's correlation coefficients ( $r$ ) of variance stabilized counts (cor function in R),  
409 transformed this into distances ( $1-r$ ), followed by hierarchical clustering (hclust function in R).  
410 Variance stabilisation was performed using the rlog function of the DESeq2 package.

## 411 **Sequence data availability**

412 The MAG SbF1 is available at MicroScope (<https://www.genoscope.cns.fr/agc/microscope/>) and is also  
413 deposited under the ENA accession number OMOF01000000. Metagenome and -transcriptomic data  
414 is available at the Joint Genome Institute (<https://genome.jgi.doe.gov/>) and is also deposited under  
415 the NCBI accession numbers PRJNA412436 and PRJNA412438, respectively.

## 416 **Acknowledgements**

417 We are grateful to Norbert Bittner, Mads Albertsen, Craig Herbold, Stephan Köstlbacher, and Florian  
418 Goldenberg for technical support. We further thank Bernhard Schink for help in naming *Ca. D.*  
419 *infrequens* and Johannes Wittmann and Silvia Bulgheresi for helpful expert opinions. We  
420 acknowledge the LABGeM (CEA/IG/Genoscope & CNRS UMR8030) and the France Génomique  
421 National infrastructure (funded as part of Investissement d'avenir program managed by Agence

422 Nationale pour la Recherche, contract ANR-10-INBS-09) for support with the MicroScope annotation  
423 platform. The work conducted by the Joint Genome Institute was supported by the Office of Science  
424 of the U.S. Department of Energy under Contract No. DE-AC02-05CH11231. This research was  
425 financially supported by the Austrian Science Fund (FWF, P23117-B17 to MP and AL, P25111-B22 to  
426 AL), the U.S. Department of Energy (CSP605 to MP and AL), the German Research Foundation (DFG,  
427 PE 2147/1-1 to MP), and the European Union (FP7-People-2013-CIG, Grant No PCIG14-GA-2013-  
428 630188 to MP).

## 429 **References**

430 Abicht HK, Mancini S, Karnachuk OV, Solioz M. (2011). Genome sequence of *Desulfosporosinus* sp.  
431 OT, an acidophilic sulfate-reducing bacterium from copper mining waste in Norilsk, Northern Siberia.  
432 *J Bacteriol* **193**: 6104–6105.

433 Abu Laban N, Tan B, Dao A, Foght J. (2015). Draft genome sequence of uncultivated  
434 *Desulfosporosinus* sp. strain Tol-M, obtained by stable isotope probing using [<sup>13</sup>C<sub>6</sub>]toluene. *Genome*  
435 *Announc* **3**: e01422–14.

436 Albertsen M, Hugenholtz P, Skarshewski A, Nielsen KL, Tyson GW, Nielsen PH. (2013). Genome  
437 sequences of rare, uncultured bacteria obtained by differential coverage binning of multiple  
438 metagenomes. *Nat Biotechnol* **31**: 533–538.

439 Alonso-Sáez L, Díaz-Pérez L, Morán XAG. (2015). The hidden seasonality of the rare biosphere in  
440 coastal marine bacterioplankton. *Environ Microbiol* **17**: 3766–3780.

441 Bergkessel M, Basta DW, Newman DK. (2016). The physiology of growth arrest: uniting molecular  
442 and environmental microbiology. *Nat Rev Microbiol* **14**: 549–562.

443 Brudal E, Winther-Larsen HC, Colquhoun DJ, Duodu S. (2013). Evaluation of reference genes for  
444 reverse transcription quantitative PCR analyses of fish-pathogenic *Francisella* strains exposed to  
445 different growth conditions. *BMC Res Notes* **6**: 76.

446 Buckel W, Thauer RK. (2013). Energy conservation via electron bifurcating ferredoxin reduction and  
447 proton/Na<sup>+</sup> translocating ferredoxin oxidation. *Biochim Biophys Acta* **1827**: 94–113.

448 Campbell BJ, Yu L, Heidelberg JF, Kirchman DL. (2011). Activity of abundant and rare bacteria in a  
449 coastal ocean. *Proc Natl Acad Sci USA* **108**: 12776–12781.

450 Ciais P, Sabine C, Bala G, Bopp L, Brovkin V, Canadell J *et al.* (2013). Carbon and Other  
451 Biogeochemical Cycles. In: Stocker T, Qin D, Plattner G-K, Tignor M, Allen S, Boschung J *et al.* (eds).  
452 *Climate Change 2013 The Physical Science Basis*. Cambridge University Press.  
453 <https://www.ipcc.ch/report/ar5/wg1/>.

- 454 Dawson W, Hör J, Egert M, Kleunen M van, Pester M. (2017). A small number of low-abundance  
455 bacteria dominate plant species-specific responses during rhizosphere colonization. *Front Microbiol*  
456 **8**: 975.
- 457 Desguin B, Goffin P, Viaene E, Kleerebezem M, Martin-Diaconescu V, Maroney MJ *et al.* (2014).  
458 Lactate racemase is a nickel-dependent enzyme activated by a widespread maturation system. *Nat*  
459 *Commun* **5**: 3615.
- 460 Frei S, Knorr K-H, Peiffer S, Fleckenstein JH. (2012). Surface micro-topography causes hot spots of  
461 biogeochemical activity in wetland systems: a virtual modeling experiment. *J Geophys Res*  
462 *Biogeosciences* **117**: G00N12.
- 463 Galperin MY, Makarova KS, Wolf YI, Koonin EV. (2015). Expanded microbial genome coverage and  
464 improved protein family annotation in the COG database. *Nucleic Acids Res* **43**: D261–D269.
- 465 Gauci V, Chapman SJ. (2006). Simultaneous inhibition of CH<sub>4</sub> efflux and stimulation of sulphate  
466 reduction in peat subject to simulated acid rain. *Soil Biol Biochem* **38**: 3506–3510.
- 467 Gauci V, Dise N, Blake S. (2005). Long-term suppression of wetland methane flux following a pulse of  
468 simulated acid rain. *Geophys Res Lett* **32**: L12804.
- 469 Gauci V, Matthews E, Dise N, Walter B, Koch D, Granberg G *et al.* (2004). Sulfur pollution suppression  
470 of the wetland methane source in the 20th and 21st centuries. *Proc Natl Acad Sci USA* **101**: 12583–  
471 12587.
- 472 Greening C, Biswas A, Carere CR, Jackson CJ, Taylor MC, Stott MB *et al.* (2016). Genomic and  
473 metagenomic surveys of hydrogenase distribution indicate H<sub>2</sub> is a widely utilised energy source for  
474 microbial growth and survival. *ISME J* **10**: 761–777.
- 475 Großkopf T, Mohr W, Baustian T, Schunck H, Gill D, Kuypers MMM *et al.* (2012). Doubling of marine  
476 dinitrogen-fixation rates based on direct measurements. *Nature* **488**: 361–364.
- 477 Haft DH, Selengut JD, White O. (2003). The TIGRFAMs database of protein families. *Nucleic Acids Res*  
478 **31**: 371–373.
- 479 Hausmann B, Knorr K-H, Schreck K, Tringe SG, Glavina del Rio T, Loy A *et al.* (2016). Consortia of low-  
480 abundance bacteria drive sulfate reduction-dependent degradation of fermentation products in peat  
481 soil microcosms. *The ISME Journal* **10**: 2365–2375.
- 482 Hausmann B, Pelikan C, Herbold CW, Köstlbacher S, Albertsen M, Eichorst SA *et al.* (2018). Peatland  
483 *Acidobacteria* with a dissimilatory sulfur metabolism. *ISME J*. doi:<https://doi.org/10.1038/s41396-018-0077-1>.  
484 0077-1[10.1038/s41396-018-0077-1].



- 485 Herbold CW, Lehtovirta-Morley LE, Jung M-Y, Jehmlich N, Hausmann B, Han P *et al.* (2017). Ammonia-  
486 oxidising archaea living at low pH: insights from comparative genomics. *Environ Microbiol* **19**: 4939-  
487 4952.
- 488 Hol WHG, Garbeva P, Hordijk C, Hundscheid PJ, Gunnewiek PJA, Van Agtmaal M *et al.* (2015). Non-  
489 random species loss in bacterial communities reduces antifungal volatile production. *Ecology* **96**:  
490 2042-2048.
- 491 Holmkvist L, Ferdelman TG, Jørgensen BB. (2011a). A cryptic sulfur cycle driven by iron in the  
492 methane zone of marine sediment (Aarhus Bay, Denmark). *Geochim Cosmochim Acta* **75**: 3581-  
493 3599.
- 494 Holmkvist L, Kamyshny A, Vogt C, Vamvakopoulos K, Ferdelman TG, Jørgensen BB. (2011b). Sulfate  
495 reduction below the sulfate-methane transition in Black Sea sediments. *Deep Sea Res Part I*  
496 *Oceanogr Res Pap* **58**: 493-504.
- 497 Huang CJ, Barrett EL. (1991). Sequence analysis and expression of the *Salmonella typhimurium* *asr*  
498 operon encoding production of hydrogen sulfide from sulfite. *J Bacteriol* **173**: 1544-1553.
- 499 Hugoni M, Taib N, Debroas D, Domaizon I, Jouan Dufournel I, Bronner G *et al.* (2013). Structure of the  
500 rare archaeal biosphere and seasonal dynamics of active ecotypes in surface coastal waters. *Proc*  
501 *Natl Acad Sci USA* **110**: 6004-6009.
- 502 Jacks G, Norrström A-C. (2004). Hydrochemistry and hydrology of forest riparian wetlands. *For Ecol*  
503 *Manage* **196**: 187-197.
- 504 Jones P, Binns D, Chang H-Y, Fraser M, Li W, McAnulla C *et al.* (2014). InterProScan 5: genome-scale  
505 protein function classification. *Bioinformatics* **30**: 1236-1240.
- 506 Jousset A, Bienhold C, Chatzinotas A, Gallien L, Gobet A, Kurm V *et al.* (2017). Where less may be  
507 more: how the rare biosphere pulls ecosystems strings. *ISME J* **11**: 853-862.
- 508 Jørgensen BB. (1982). Mineralization of organic matter in the sea bed—the role of sulphate reduction.  
509 *Nature* **296**: 643-645.
- 510 Kirschke S, Bousquet P, Ciais P, Saunois M, Canadell JG, Dlugokencky EJ *et al.* (2013). Three decades  
511 of global methane sources and sinks. *Nat Geosci* **6**: 813-823.
- 512 Knorr K-H, Blodau C. (2009). Impact of experimental drought and rewetting on redox transformations  
513 and methanogenesis in mesocosms of a northern fen soil. *Soil Biol Biochem* **41**: 1187-1198.
- 514 Knorr K-H, Lischeid G, Blodau C. (2009). Dynamics of redox processes in a minerotrophic fen exposed  
515 to a water table manipulation. *Geoderma* **153**: 379-392.

- 516 Küsel K, Blöthe M, Schulz D, Reiche M, Drake HL. (2008). Microbial reduction of iron and porewater  
517 biogeochemistry in acidic peatlands. *Biogeosciences* **5**: 1537–1549.
- 518 Kvint K, Nachin L, Diez A, Nyström T. (2003). The bacterial universal stress protein: function and  
519 regulation. *Curr Opin Microbiol* **6**: 140–145.
- 520 Langmead B, Salzberg SL. (2012). Fast gapped-read alignment with Bowtie 2. *Nat Methods* **9**: 357–  
521 359.
- 522 Lartillot N, Lepage T, Blanquart S. (2009). PhyloBayes 3: a Bayesian software package for  
523 phylogenetic reconstruction and molecular dating. *Bioinformatics* **25**: 2286–2288.
- 524 Leloup J, Fossing H, Kohls K, Holmkvist L, Borowski C, Jørgensen BB. (2009). Sulfate-reducing bacteria  
525 in marine sediment (Aarhus Bay, Denmark): abundance and diversity related to geochemical  
526 zonation. *Environ Microbiol* **11**: 1278–1291.
- 527 Liao Y, Smyth GK, Shi W. (2014). featureCounts: an efficient general purpose program for assigning  
528 sequence reads to genomic features. *Bioinformatics* **30**: 923–930.
- 529 Love MI, Huber W, Anders S. (2014). Moderated estimation of fold change and dispersion for RNA-seq  
530 data with DESeq2. *Genome Biol* **15**: 550.
- 531 Lynch MDJ, Neufeld JD. (2015). Ecology and exploration of the rare biosphere. *Nat Rev Microbiol* **13**:  
532 217–229.
- 533 Mallon CA, Poly F, Le Roux X, Marring I, Elsas JD van, Salles JF. (2015). Resource pulses can alleviate  
534 the biodiversity-invasion relationship in soil microbial communities. *Ecology* **96**: 915–926.
- 535 Mardanov AV, Panova IA, Beletsky AV, Avakyan MR, Kadnikov VV, Antsiferov DV *et al.* (2016).  
536 Genomic insights into a new acidophilic, copper-resistant *Desulfosporosinus* isolate from the oxidized  
537 tailings area of an abandoned gold mine. *FEMS Microbiol Ecol* **92**: fiw111.
- 538 Mitchell A, Chang H-Y, Daugherty L, Fraser M, Hunter S, Lopez R *et al.* (2015). The InterPro protein  
539 families database: the classification resource after 15 years. *Nucleic Acids Res* **43**: D213–D221.
- 540 Mojardín L, Salas M. (2016). Global transcriptional analysis of virus-host interactions between phage  
541  $\phi$ 29 and *Bacillus subtilis*. *J Virol* **90**: 9293–9304.
- 542 Muyzer G, Stams AJM. (2008). The ecology and biotechnology of sulphate-reducing bacteria. *Nat Rev*  
543 *Microbiol* **6**: 441–454.
- 544 Müller AL, de Rezende JR, Hubert CRJ, Kjeldsen KU, Lagkouvardos I, Berry D *et al.* (2014). Endospores  
545 of thermophilic bacteria as tracers of microbial dispersal by ocean currents. *ISME J* **8**: 1153–1165.
- 546 Newton RJ, Huse SM, Morrison HG, Peake CS, Sogin ML, McLellan SL. (2013). Shifts in the microbial

- 547 community composition of Gulf Coast beaches following beach oiling. Gilbert JA (ed). *PLoS One* **8**:  
548 e74265.
- 549 Notredame C, Higgins DG, Heringa J. (2000). T-Coffee: a novel method for fast and accurate multiple  
550 sequence alignment. *J Mol Biol* **302**: 205–217.
- 551 Overbeek R, Olson R, Pusch GD, Olsen GJ, Davis JJ, Disz T *et al.* (2014). The SEED and the Rapid  
552 Annotation of microbial genomes using Subsystems Technology (RAST). *Nucleic Acids Res* **42**: D206–  
553 D214.
- 554 Parks DH, Imelfort M, Skennerton CT, Hugenholtz P, Tyson GW. (2015). CheckM: assessing the  
555 quality of microbial genomes recovered from isolates, single cells, and metagenomes. *Genome Res*  
556 **25**: 1043–1055.
- 557 Pedrós-Alió C. (2012). The rare bacterial biosphere. *Ann Rev Mar Sci* **4**: 449–466.
- 558 Pester M, Bittner N, Deevong P, Wagner M, Loy A. (2010). A ‘rare biosphere’ microorganism  
559 contributes to sulfate reduction in a peatland. *ISME J* **4**: 1591–1602.
- 560 Pester M, Brambilla E, Alazard D, Rattei T, Weinmaier T, Han J *et al.* (2012a). Complete genome  
561 sequences of *Desulfosporosinus orientis* DSM765<sup>T</sup>, *Desulfosporosinus youngiae* DSM17734<sup>T</sup>,  
562 *Desulfosporosinus meridiei* DSM13257<sup>T</sup>, and *Desulfosporosinus acidiphilus* DSM22704<sup>T</sup>. *J Bacteriol*  
563 **194**: 6300–6301.
- 564 Pester M, Knorr K-H, Friedrich MW, Wagner M, Loy A. (2012b). Sulfate-reducing microorganisms in  
565 wetlands – fameless actors in carbon cycling and climate change. *Front Microbiol* **3**: 72.
- 566 Petzsch P, Poehlein A, Johnson DB, Daniel R, Schlömann M, Mühling M. (2015). Genome sequence of  
567 the moderately acidophilic sulfate-reducing firmicute *Desulfosporosinus acididurans* (Strain M1<sup>T</sup>).  
568 *Genome Announc* **3**: e00881–15.
- 569 Pierce E, Xie G, Barabote RD, Saunders E, Han CS, Detter JC *et al.* (2008). The complete genome  
570 sequence of *Moorella thermoacetica* (f. *Clostridium thermoaceticum*). *Environ Microbiol* **10**: 2550–  
571 2573.
- 572 Pruesse E, Peplies J, Glöckner FO. (2012). SINA: accurate high-throughput multiple sequence  
573 alignment of ribosomal RNA genes. *Bioinformatics* **28**: 1823–1829.
- 574 Quast C, Pruesse E, Yilmaz P, Gerken J, Schweer T, Yarza P *et al.* (2013). The SILVA ribosomal RNA  
575 gene database project: improved data processing and web-based tools. *Nucleic Acids Res* **41**: D590–  
576 D596.
- 577 R Core Team. (2017). R: a language and environment for statistical computing. R Foundation for

- 578 Statistical Computing: Vienna, Austria. <http://www.r-project.org/>.
- 579 Rabus R, Venceslau SS, Wöhlbrand L, Voordouw G, Wall JD, Pereira IAC. (2015). A post-genomic view  
580 of the ecophysiology, catabolism and biotechnological relevance of sulphate-reducing prokaryotes.  
581 *Adv Microb Physiol* **66**: 55-321.
- 582 Reiche M, Hädrich A, Lischeid G, Küsel K. (2009). Impact of manipulated drought and heavy rainfall  
583 events on peat mineralization processes and source-sink functions of an acidic fen. *J Geophys Res*  
584 *Biogeosciences* **114**: G02021.
- 585 Rolfe MD, Rice CJ, Lucchini S, Pin C, Thompson A, Cameron ADS *et al.* (2012). Lag phase is a distinct  
586 growth phase that prepares bacteria for exponential growth and involves transient metal  
587 accumulation. *J Bacteriol* **194**: 686-701.
- 588 Saunio M, Bousquet P, Poulter B, Peregon A, Ciais P, Canadell JG *et al.* (2016). The global methane  
589 budget 2000-2012. *Earth Syst Sci Data* **8**: 697-751.
- 590 Schmalenberger A, Drake HL, Küsel K. (2007). High unique diversity of sulfate-reducing prokaryotes  
591 characterized in a depth gradient in an acidic fen. *Environ Microbiol* **9**: 1317-1328.
- 592 Schmidt A, Müller N, Schink B, Schleheck D. (2013). A proteomic view at the biochemistry of  
593 syntrophic butyrate oxidation in *Syntrophomonas wolfei*. *PLoS One* **8**: e56905.
- 594 Sihto H-M, Tasara T, Stephan R, Jöhler S. (2014). Validation of reference genes for normalization of  
595 qPCR mRNA expression levels in *Staphylococcus aureus* exposed to osmotic and lactic acid stress  
596 conditions encountered during food production and preservation. *FEMS Microbiol Lett* **356**: 134-140.
- 597 Silva J, Carvalho AS, Ferreira R, Vitorino R, Amado F, Domingues P *et al.* (2005). Effect of the pH of  
598 growth on the survival of *Lactobacillus delbrueckii* subsp. *bulgaricus* to stress conditions during  
599 spray-drying. *J Appl Microbiol* **98**: 775-782.
- 600 Sogin ML, Morrison HG, Huber JA, Mark Welch D, Huse SM, Neal PR *et al.* (2006). Microbial diversity in  
601 the deep sea and the underexplored 'rare biosphere'. *Proc Natl Acad Sci USA* **103**: 12115-12120.
- 602 Stackebrandt E, Ebers J. (2006). Taxonomic parameters revisited: tarnished gold standards. *Microbiol*  
603 *Today* **33**: 152-155.
- 604 Sumbly KM, Grbin PR, Jiranek V. (2012). Validation of the use of multiple internal control genes, and  
605 the application of real-time quantitative PCR, to study esterase gene expression in *Oenococcus oeni*.  
606 *Appl Microbiol Biotechnol* **96**: 1039-1047.
- 607 Teira E, Lekunberri I, Gasol JM, Nieto-Cid M, Alvarez-Salgado XA, Figueiras FG. (2007). Dynamics of  
608 the hydrocarbon-degrading *Cycloclasticus* bacteria during mesocosm-simulated oil spills. *Environ*

- 609 *Microbiol* **9**: 2551-2562.
- 610 The UniProt Consortium. (2017). UniProt: the universal protein knowledgebase. *Nucleic Acids Res* **45**:  
611 D158-D169.
- 612 Trifinopoulos J, Nguyen L-T, von Haeseler A, Minh BQ. (2016). W-IQ-TREE: a fast online phylogenetic  
613 tool for maximum likelihood analysis. *Nucleic Acids Res* **44**: W232-W235.
- 614 Vallenet D, Calteau A, Cruveiller S, Gachet M, Lajus A, Josso A *et al.* (2017). MicroScope in 2017: an  
615 expanding and evolving integrated resource for community expertise of microbial genomes. *Nucleic*  
616 *Acids Res* **45**: D517-D528.
- 617 van Elsas JD, Chiurazzi M, Mallon CA, Elhottova D, Kristufek V, Salles JF. (2012). Microbial diversity  
618 determines the invasion of soil by a bacterial pathogen. *Proc Natl Acad Sci USA* **109**: 1159-1164.
- 619 Varghese NJ, Mukherjee S, Ivanova N, Konstantinidis KT, Mavrommatis K, Kyrpides NC *et al.* (2015).  
620 Microbial species delineation using whole genome sequences. *Nucleic Acids Res* **43**: 6761-6771.
- 621 Vergin K, Done B, Carlson C, Giovannoni S. (2013). Spatiotemporal distributions of rare  
622 bacterioplankton populations indicate adaptive strategies in the oligotrophic ocean. *Aquat Microb*  
623 *Ecol* **71**: 1-13.
- 624 Vivant A-L, Garmyn D, Maron P-A, Nowak V, Piveteau P. (2013). Microbial diversity and structure are  
625 drivers of the biological barrier effect against *Listeria monocytogenes* in soil. *PLoS One* **8**: e76991.
- 626 Weghoff MC, Bertsch J, Müller V. (2015). A novel mode of lactate metabolism in strictly anaerobic  
627 bacteria. *Environ Microbiol* **17**: 670-677.
- 628 Zhang Y, Jiang T, Sheng B, Long Y, Gao C, Ma C *et al.* (2016). Coexistence of two D-lactate-utilizing  
629 systems in *Pseudomonas putida* KT2440. *Environ Microbiol Rep* **8**: 699-707.

## 630 **Figures**

### 631 **Fig. 1**

632 Metabolic model of *Desulfosporosinus* MAG SbF1. Gene expression stimulated by specific substrates  
633 in combination with sulfate is indicated by coloured points. Paralogous genes are indicated by an  
634 underscore followed by a number. Plus signs indicates proposed protein complexes. Details for all  
635 genes are in given in Table S1 and transcription patterns are shown in Fig. 3. For the citric acid cycle  
636 and anaplerotic reactions, carriers of reducing equivalents and further by-products are not shown.  
637 The following abbreviations were used. X: unknown reducing equivalents, e.g., NAD<sup>+</sup> or ferredoxin.  
638 WL: Wood-Ljungdahl pathway consisting of enzymes encoded by the *acs* operon, MetF, F<sub>o</sub>D, F<sub>h</sub>A,  
639 and F<sub>h</sub>s. TCA: citric acid cycle. FDH: formate dehydrogenase. Hase: hydrogenase. NDH-1: NADH  
640 dehydrogenase 1. LDH: lactate dehydrogenase.

### 641 **Fig. 2**

642 Time-resolved transcriptional changes of *Desulfosporosinus* MAG SbF1 in anoxic peat soil  
643 microcosms under various *in situ*-like conditions. (a) Total mRNA of all CDS and (b) selected genes  
644 encoding the sulfate-reduction pathway (*sat*, *dsrA*), ribosomal proteins of the large (*rplA*) and small  
645 subunit (*rpsC*), cell division (*ftsZ*), DNA replication (*gyrB*), and peptidoglycan synthesis (*murA*). Solid  
646 lines and symbols represent sulfate-stimulated microcosms whereas dashed lines and open symbols  
647 represent control microcosms without external sulfate. Panels represent the various substrate  
648 incubations, native stands for native peat soil. Different symbols represent replicates and are  
649 consistent throughout all panels.

### 650 **Fig. 3**

651 Transcription patterns of whole pathways and central enzyme complexes involved in the carbon and  
652 energy metabolism of *Desulfosporosinus* MAG SbF1 under *in situ*-like conditions. In addition,  
653 transcription patterns of general stress response proteins are shown. Mean abundance for the native  
654 soil (—) and each incubation treatment and time point is shown. Supplemented substrates are  
655 indicated by initials and addition of external sulfate is depicted by –S/+S (columns). Abundance  
656 values are normalized variance-stabilized counts  $x$ , which were scaled from 0 to 1 for each CDS  
657 using the formula  $[x - \min(x)] / \max[x - \min(x)]$ . Incompletely assembled genes are indicated by *\_a*,  
658 *\_b*, and *\_c*.



**Fig. 1.**

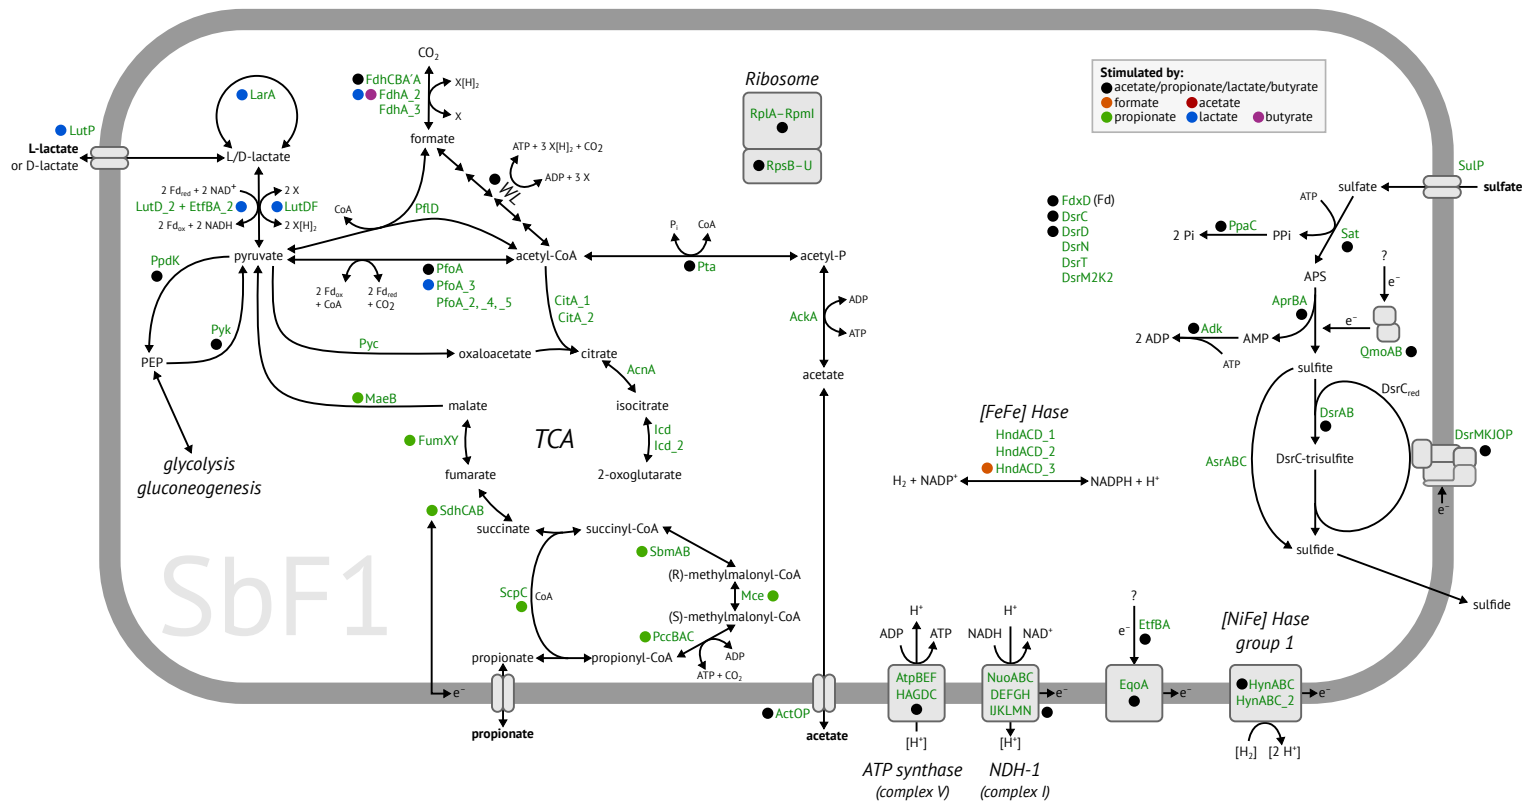

**Fig. 2.**

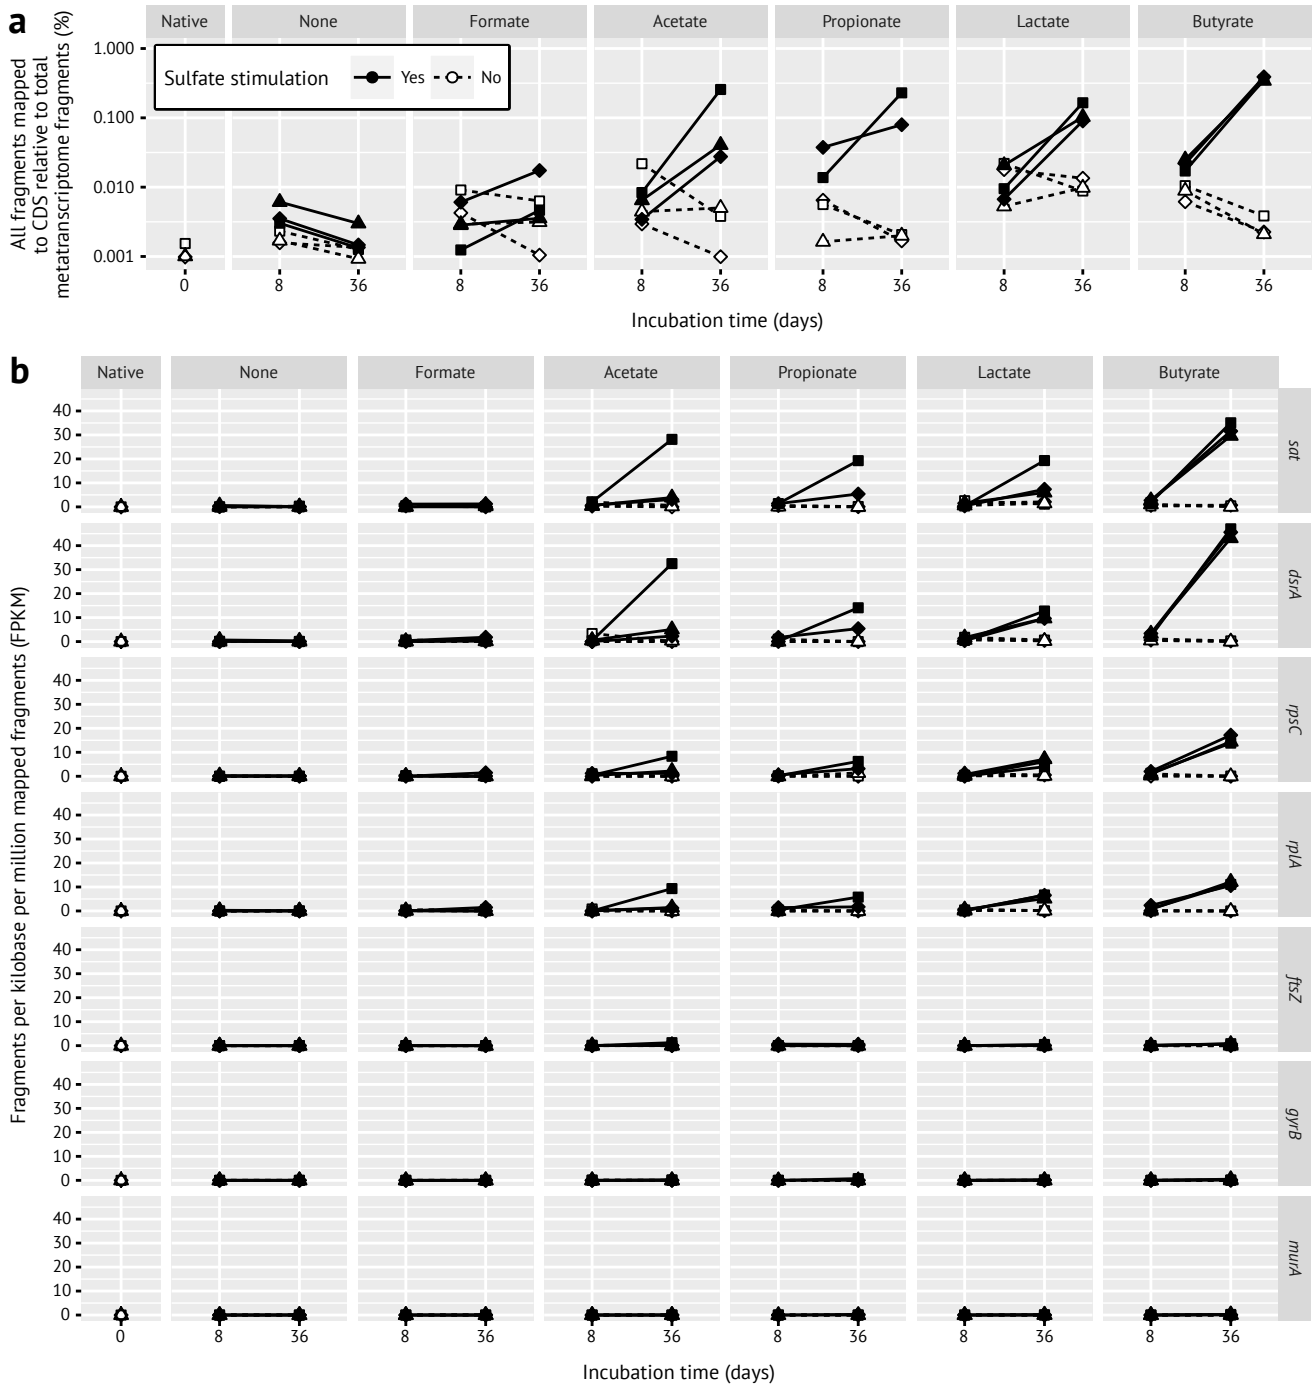



# 1 Supplementary Information

## 2 Supplementary Tables

### 3 Table S1

4 Summary of all genomic features in *Desulfosporosinus* MAG SbF1. Genes encoding the energy  
5 metabolism or central cellular functions are given first. COG class IDs were assigned by MaGe  
6 (Cognitor, [www.ncbi.nlm.nih.gov/COG/](http://www.ncbi.nlm.nih.gov/COG/)). bactNOG and NOG IDs were assigned by best-match  
7 principle (Huerta-Cepas *et al.*, 2016; Hausmann *et al.*, 2018). Spearman's rank correlation is given  
8 for each gene's transcripts as compared to total mRNA counts (FDR-adjusted  $p$ -values are indicated  
9 by asterisks: \*, < 0.05; \*\*, < 0.01; \*\*\*, < 0.001). Expression clusters represent the clusters  
10 assigned by correlation and hierarchical clustering analysis. The next five columns are  $\log_2$  fold-  
11 changes of expression levels after 36 days of incubation in the sulfate-stimulated microcosms (i.e.,  
12 substrate vs no-substrate-control). Missing fold-changes are due to all counts being zero in both  
13 compared treatments. Ranks are based on mean fragments per kilobase per million mapped  
14 fragments (FPKM). Also here, only data of sulfate-stimulated microcosms after 36 days of incubation  
15 are shown in addition to the native soil. Missing ranks indicate that expression was never detected in  
16 any replicate. Fragmented, i.e., mainly incompletely assembled genes are indicated by \_a, \_b, and  
17 \_c. A <sup>1</sup> or <sup>2</sup> in the strand column indicates that this CDS is either the first or last on a scaffold,  
18 respectively (depending on the reading frame).

### 19 Table S2

20 Characteristics and coverage of all scaffolds belonging to *Desulfosporosinus* MAG SbF1. The two  
21 scaffolds with the highest coverage encode the 23S and 16S rRNA genes, respectively.

### 22 Table S3

23 Expression levels of selected CDS in the analysed anoxic peat soil microcosms given in FPKM (mean  
24  $\pm$  one standard deviation). Loci are sorted as in Table S1. Headers display the individual treatments  
25 used in the peat soil microcosms: without and with external sulfate added; amended substrate; and  
26 days of incubation.

## 27 **Supplementary Figures**

### 28 **Fig. S1**

29 Differential coverage plots of assembled scaffolds with *Desulfosporosinus* MAG SbF1 scaffolds  
30 highlighted by black circles. The average coverage per scaffold in the SIP metagenome is visualized  
31 without (a) and with (b) G+C content transformation (see Materials and Methods). Taxonomic  
32 affiliation is indicated by color and based on BLAST as described previously (Albertsen *et al.*, 2013).  
33 White circles represent unclassified scaffolds. Only scaffolds >10 000 nt length are shown, except  
34 when belonging to SbF1. Scaffolds encoding selected genes in SbF1 are labelled accordingly.

### 35 **Fig. S2**

36 (a) Maximum likelihood 16S rRNA gene tree of species belonging to the genera *Desulfosporosinus*  
37 and *Desulfitobacterium*. Branch supports of  $\geq 0.9$  and  $\geq 0.7$  are indicated by filled and open circles,  
38 respectively. GenBank accession numbers are given in parentheses. (b) Bayesian inference  
39 phylogenomic tree showing the phylogenetic placement of *Desulfosporosinus* MAG SbF1. All  
40 branches were supported  $> 0.9$  (filled circles). The tree was rooted against genomes from the  
41 *Acidobacteria*, *Proteobacteria*, and *Verrucomicrobia* (not shown). Genome accession numbers are  
42 given in parentheses.

### 43 **Fig. S3**

44 Two-way average amino and nucleic acid identities between *Desulfosporosinus* and  
45 *Desulfitobacterium* species genomes (in%, written into cells). The dendrogram is based on Fig. S2b.

### 46 **Fig. S4**

47 Time-resolved changes of all unambiguously identified genes related to cell division (a), DNA  
48 replication (b) and cell envelope biogenesis (c); *dsrA* is included for reference, analogous to Fig. 2.

## 49 **Supplementary References**

50 Albertsen M, Hugenholtz P, Skarshewski A, Nielsen KL, Tyson GW, Nielsen PH. (2013). Genome  
51 sequences of rare, uncultured bacteria obtained by differential coverage binning of multiple  
52 metagenomes. *Nat Biotechnol* **31**: 533–538.

53 Hausmann B, Pelikan C, Herbold CW, Köstlbacher S, Albertsen M, Eichorst SA *et al.* (2018). Peatland  
54 *Acidobacteria* with a dissimilatory sulfur metabolism. *ISME J*. doi:<https://doi.org/10.1038/s41396-018-0077-1>.  
55 0077-1[10.1038/s41396-018-0077-1].

56 Huerta-Cepas J, Szklarczyk D, Forslund K, Cook H, Heller D, Walter MC *et al.* (2016). eggNOG 4.5: a  
57 hierarchical orthology framework with improved functional annotations for eukaryotic, prokaryotic  
58 and viral sequences. *Nucleic Acids Res* **44**: D286–D293.

**Fig. S1.**

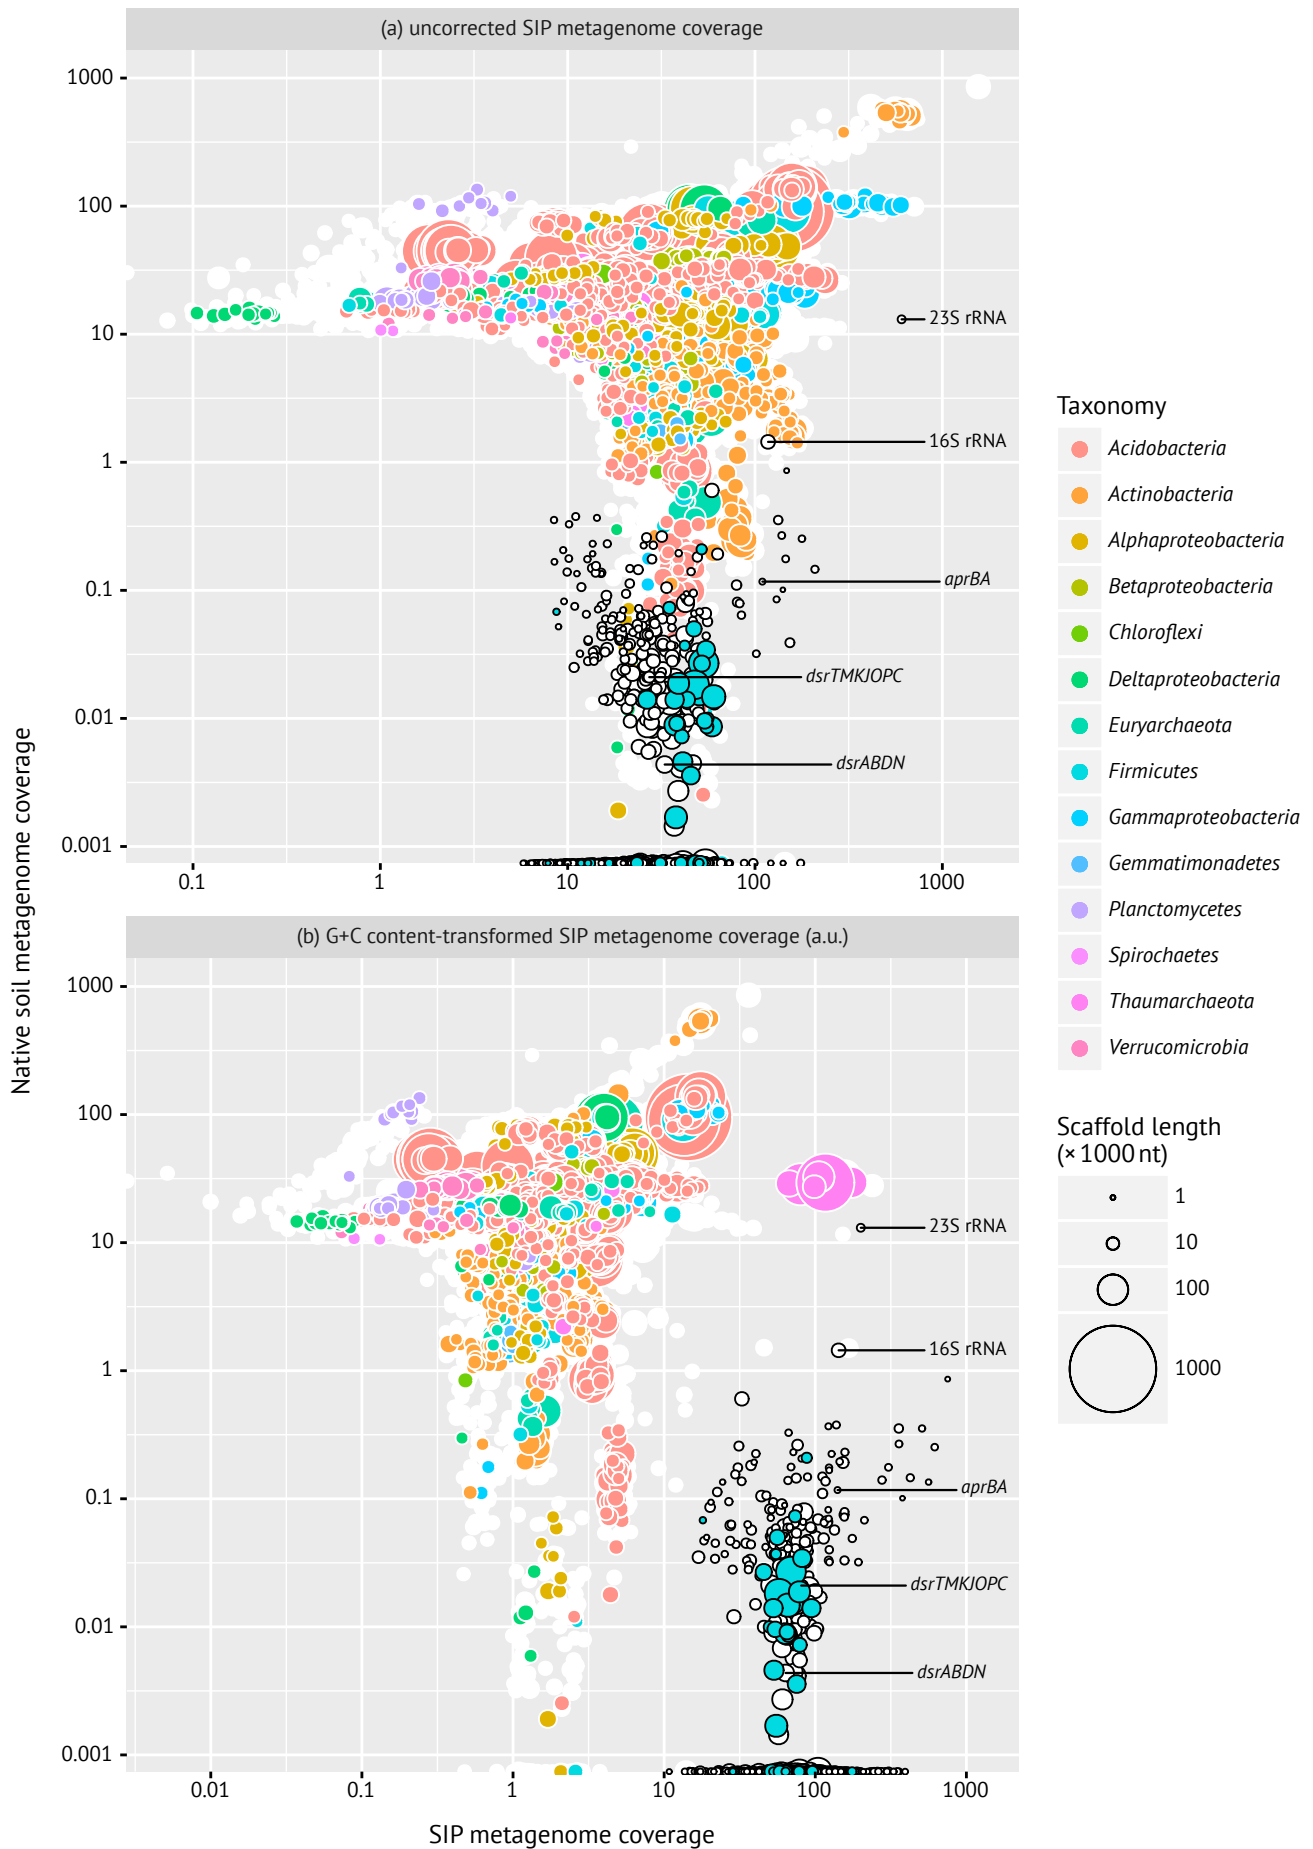



## Fig. S2.

### (a) 16S rRNA gene

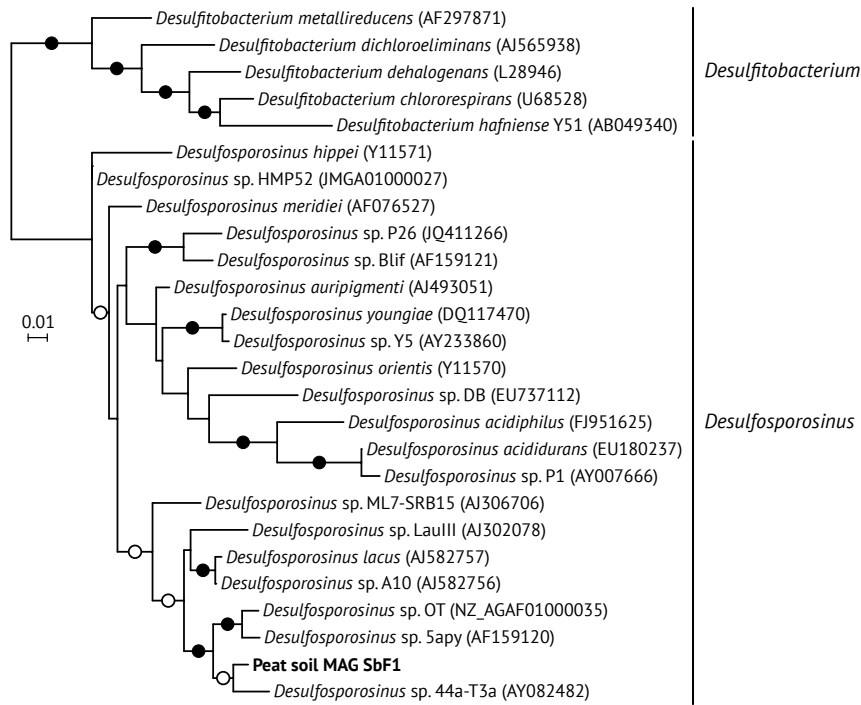

### (b) genome

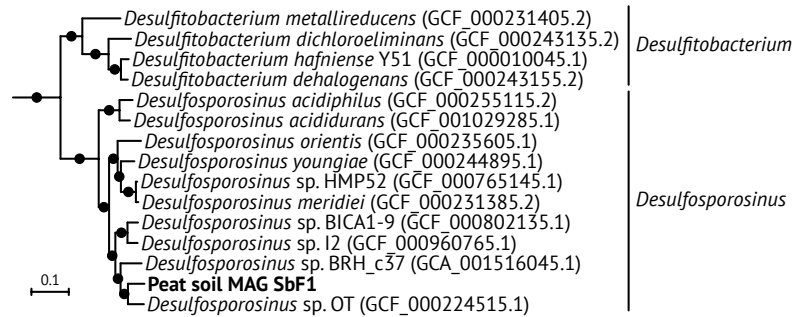

Fig. S3.

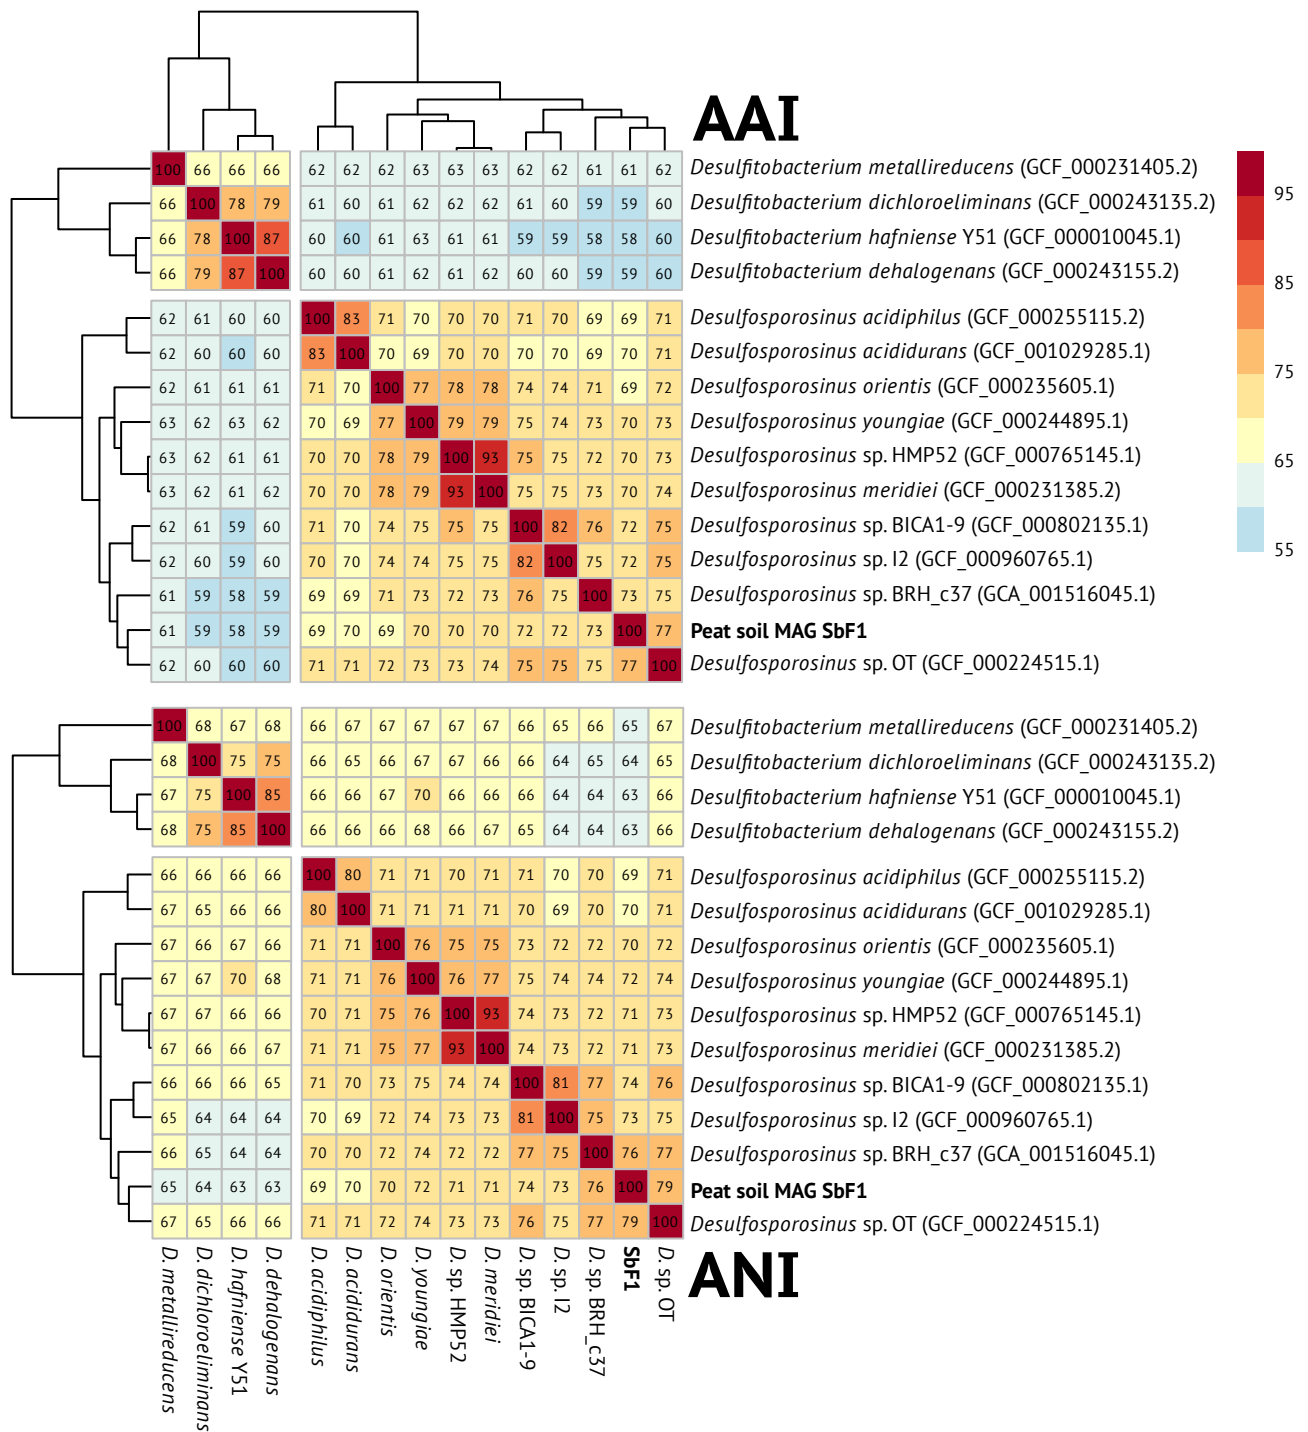

**Fig. S4a.**

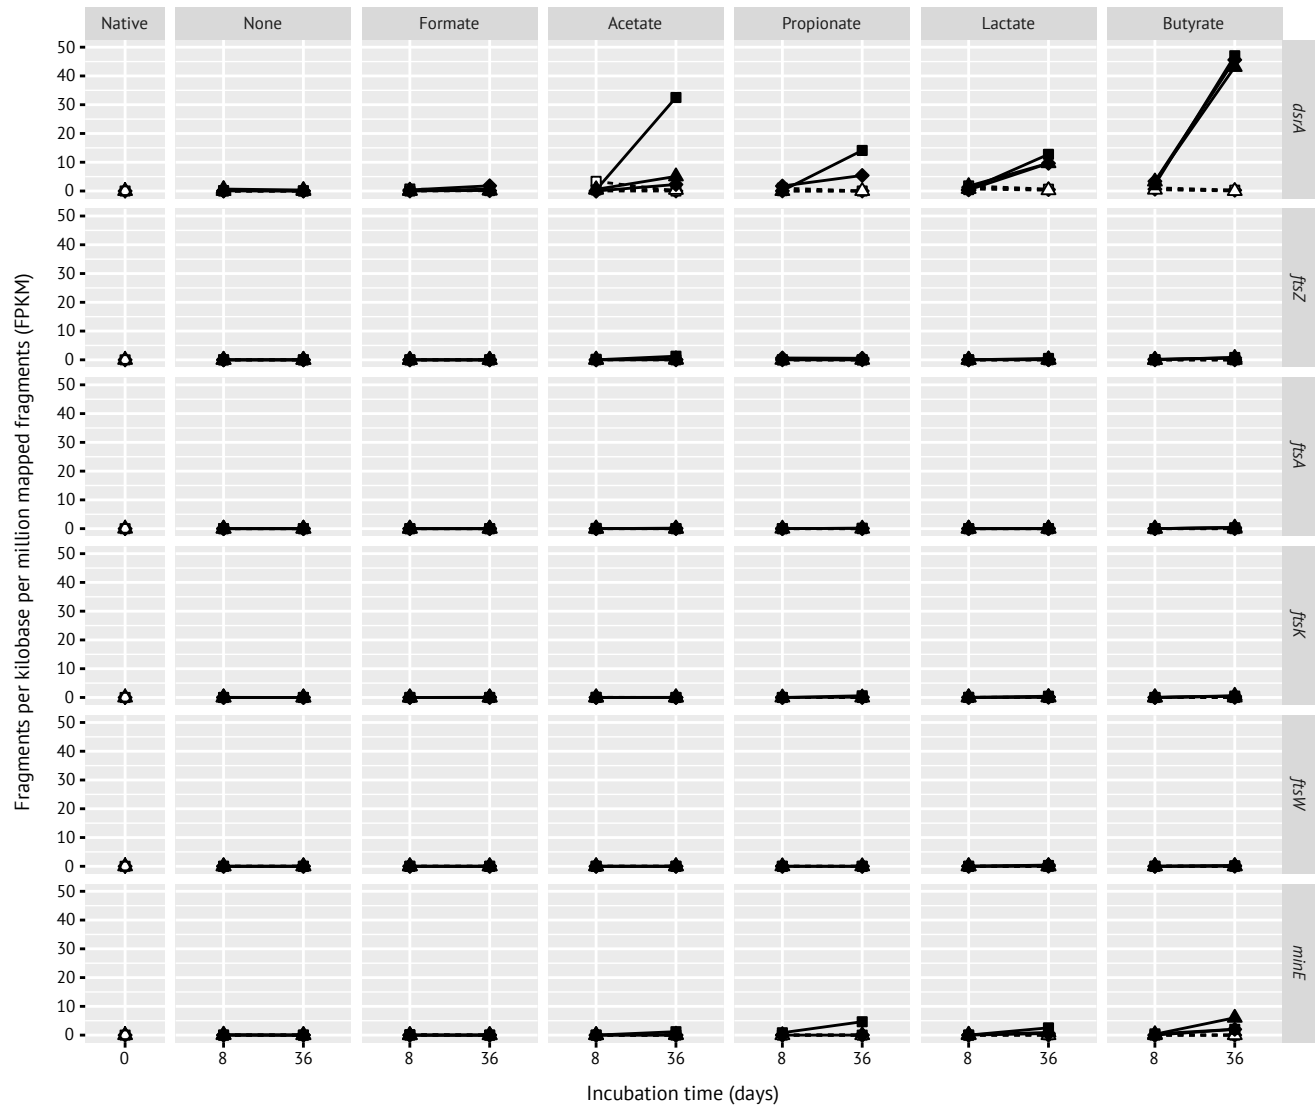

**Fig. S4b.**

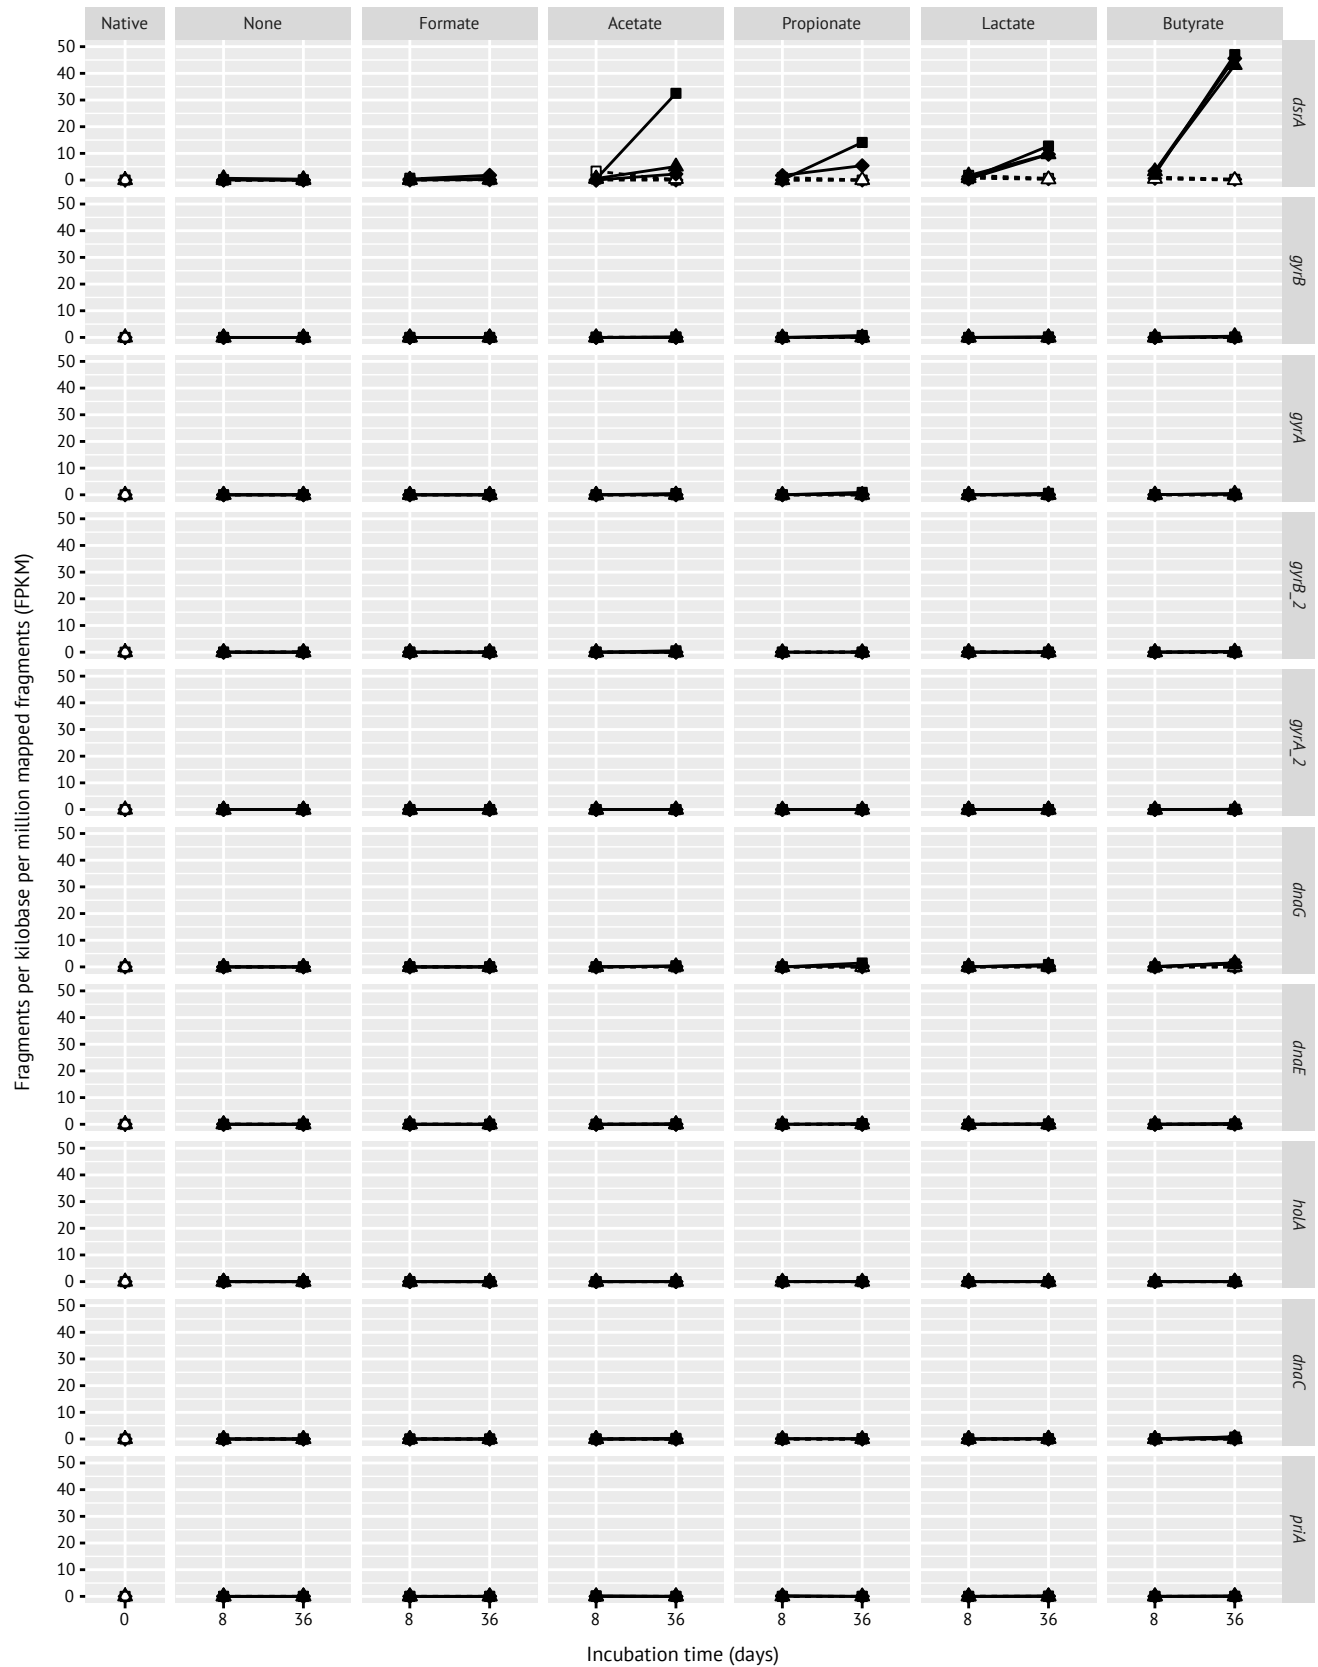

Fig. S4c.

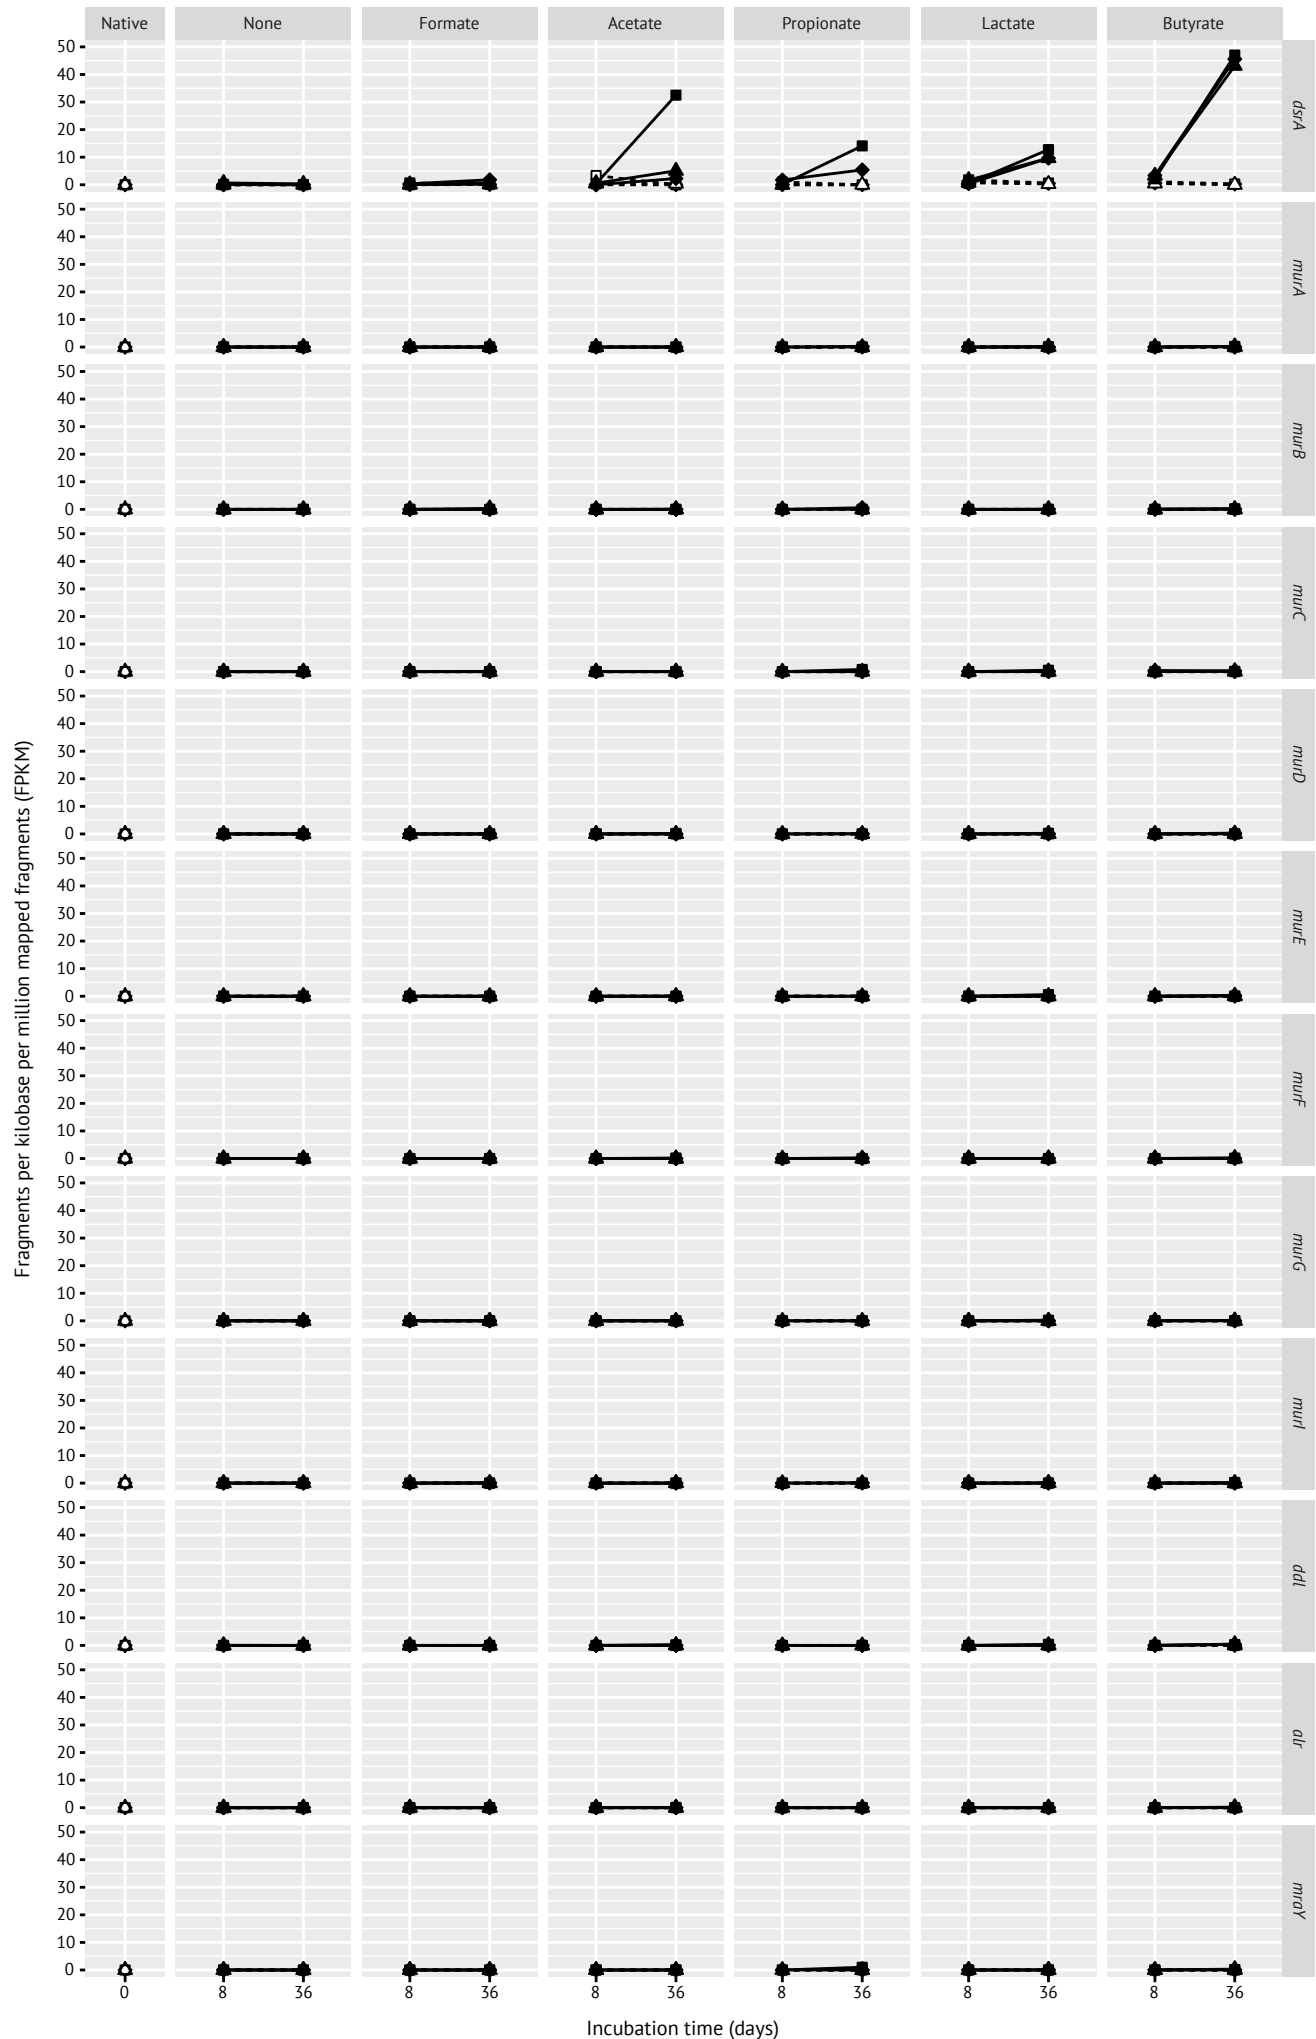

Source: http://biorxiv.org/content/10.1101/284430v1.full.pdf
